1 **Short title**

2 Cotton floral and extrafloral nectaries

3

4 **Author for Contact details**

5 Basil J. Nikolau

6 dimmas@iastate.edu

7

8 **Article title**

9 Systems analyses of key metabolic modules of floral and extrafloral nectaries of cotton

10

11 **Authors**

12 Elizabeth C. Chatt<sup>1</sup>, Siti-Nabilla Mahalim<sup>1</sup>, Nur-Aziatull Mohd-Fadzil<sup>1</sup>, Rahul Roy<sup>2</sup>, Peter  
13 M. Klinkenberg<sup>2</sup>, Harry T. Horner<sup>3,4</sup>, Marshall Hampton<sup>5</sup>, Clay J. Carter<sup>2</sup>, and Basil J.  
14 Nikolau<sup>1</sup>

15 <sup>1</sup>Department of Biochemistry, Biophysics and Molecular Biology, Iowa State University,  
16 Ames, IA, United States

17 <sup>2</sup>Department of Plant and Microbial Biology, University of Minnesota Twin Cities, St. Paul,  
18 MN, United States

19 <sup>3</sup>Department of Genetics, Development and Cell Biology, Iowa State University, Ames, IA,  
20 United States

21 <sup>4</sup>Roy J. Carver High Resolution Microscopy Facility, Iowa State University, Ames, IA,  
22 United States

23 <sup>5</sup>Department of Mathematics & Statistics, University of Minnesota Duluth, Duluth, MN,  
24 United States

25

26 **Author contributions**

27 ECC, CJC, and BJN conceived and planned the study. Sample collection, microscopy, and  
28 metabolomic analyses were conducted by ECC, SNM, and NAMF. Additional contributions  
29 for microscopic analyses were provided by HTH. RNA preparation was completed by PMK,  
30 RR, and CJC. MH processed all RNAseq data and conducted informatics analyses in  
31 conjunction with ECC. ECC and BJN wrote the manuscript with feedback from all  
32 coauthors.

33

34 **One sentence summary**

35 The eccrine-based model of nectar synthesis and secretion is conserved in both trichomatic  
36 and extrafloral nectaries determined by a system-based comparison of cotton (*Gossypium*  
37 *hirsutum*) nectaries.

38 **Funding information**

39 This work was supported by the National Science Foundation award #IOS 1339246 to BJN  
40 and CJC

41

42

43

44

45

46

47 **Abstract**

48 Nectar is a primary reward mediating plant-animal mutualisms to improve plant fitness and  
49 reproductive success. In *Gossypium hirsutum* (cotton), four distinct trichomatic nectaries  
50 develop, one floral and three extrafloral. The secreted floral and extrafloral nectars serve  
51 different purposes, with the floral nectar attracting bees to promote pollination and the  
52 extrafloral nectar attracting predatory insects as a means of indirect resistance from herbivores.  
53 Cotton therefore provides an ideal system to contrast mechanisms of nectar production and  
54 nectar composition between floral and extrafloral nectaries. Here, we report the transcriptome,  
55 ultrastructure, and metabolite spatial distribution using mass spectrometric imaging of the four  
56 cotton nectary types throughout development. Additionally, the secreted nectar metabolomes  
57 were defined and were jointly composed of 197 analytes, 60 of which were identified.  
58 Integration of these datasets support the coordination of merocrine-based and eccrine-based  
59 models of nectar synthesis. The nectary ultrastructure supports the merocrine-based model due  
60 to the abundance of rough endoplasmic reticulum positioned parallel to the cell walls and  
61 profusion of vesicles fusing to the plasma membranes. The eccrine-based model which consist  
62 of a progression from starch synthesis to starch degradation and to sucrose biosynthesis was  
63 supported by gene expression data. This demonstrates conservation of the eccrine-based model  
64 for the first time in both trichomatic and extrafloral nectaries. Lastly, nectary gene expression  
65 data provided evidence to support *de novo* synthesis of amino acids detected in the secreted  
66 nectars.

67

68

69

## 70 **Introduction**

71 Nectars are sugar-rich solutions, produced and secreted from nectary glands, and  
72 present an attractive reward to animal mutualists in exchange for ecosystem services. In the  
73 case of floral nectar this service is pollination, and extrafloral nectars are offered to recruit  
74 pugnacious predatory insects and provide indirect protection from herbivores (Mitchell et al.,  
75 2009; Ollerton, 2017; Simpson and Neff, 1981). These plant-animal mutualisms improve plant  
76 fitness and reproductive success. Domesticated Upland cotton, *Gossypium hirsutum*, develops  
77 a floral and three distinct extrafloral nectaries, all of which are trichomatic nectaries secreting  
78 the nectar from specialized papillae, a type of multicellular glandular trichome. While cotton  
79 is largely a self-pollinating crop, honey bee visitations, facilitated by the floral nectar reward,  
80 increases yield of total number of bolls and total lint mass produced (Rhodes, 2002). The  
81 extrafloral nectars provide a source of indirect protection by attracting aggressive predatory  
82 ants which ward off various herbivores (Bentley, 1977; González-Teuber et al., 2012; Rudgers  
83 et al., 2003; Rudgers and Strauss, 2004; Wäckers et al., 2001).

84 The patterns of nectar secretion vary among the different cotton nectaries, and are  
85 optimized for benefits, while minimizing the energetic cost of producing the nectar (Heil, 2011;  
86 Pleasants, 1983; Wäckers and Bonifay, 2004). The floral nectary actively secretes on the day  
87 of anthesis (Gilliam et al., 1981), whereas the extrafloral nectaries modulate nectar secretion  
88 based on the environmental stressor of insect herbivory (Wäckers and Bonifay, 2004). For  
89 example, the vegetative foliar nectary, located on the abaxial surface of the leaf midvein,  
90 displays low constitutive secretion, which is induced by herbivory (Wäckers et al., 2001;  
91 Wäckers and Bonifay, 2004). In contrast, the reproductive extrafloral nectaries, bracteal and  
92 circumbracteal, which are located on the abaxial surface of the bracts and sepal respectively,

93 display peak nectar production on the day of anthesis and continue to secrete as the boll  
94 matures, but secretion will decrease in response to herbivory (Wäckers and Bonifay, 2004),  
95 indicating more complex regulatory circuitry for control in nectar production.

96         The molecular underpinnings of nectar synthesis and secretion are beginning to be  
97 elucidated through advancements in “omics” technologies primarily using the floral nectaries  
98 of *Arabidopsis*, *Cucurbita pepo* and *Nicotiana* spp. (Kram et al., 2009; Lin et al., 2014; Ren et  
99 al., 2007; Solhaug et al., 2019). These studies provide evidence to support an eccrine-based  
100 model of nectar synthesis and secretion, which utilizes pores and transporters for movement of  
101 pre-nectar metabolites through the plasma membrane of nectariferous parenchyma tissues  
102 [reviewed by (Roy et al., 2017)]. In this model, prior to nectar secretion the ‘pre-nectar’ sugar  
103 metabolites are delivered through the vasculature and stored in the nectary parenchyma,  
104 primarily as starch (Chatt et al., 2018; Lin et al., 2014; Peng et al., 2004; Ren et al., 2007;  
105 Solhaug et al., 2019). At the time of nectar secretion, the stored starch is rapidly degraded, and  
106 the products are used to synthesize sucrose through the enzymatic action of sucrose-phosphate  
107 synthases (SPS) and sucrose-phosphate phosphatases. The sucrose is exported into the  
108 apoplasm in a concentration dependent manner via the uniporter SWEET9, and subsequently  
109 hydrolyzed by cell wall invertase (CWINV4), to the hexose components glucose and fructose,  
110 thereby maintaining the sucrose concentration gradient (Lin et al., 2014; Ruhlmann et al.,  
111 2010). The last step of sucrose hydrolysis is critical to the production of hexose-rich nectars  
112 (Ruhlmann et al., 2010), but may play a minimal role in production of sucrose-rich nectars  
113 (Chatt et al., 2018; Solhaug et al., 2019).

114         In order to fulfill biological functions, nectar components must be released from the  
115 nectary into the environment. Nectaries containing ‘nectarostomata’ simply release the nectar

116 through these modified stomata (Paiva, 2017). The means by which nectar passes through the  
117 cell wall and cuticle of trichomatic nectaries is unclear as the current understanding is based  
118 solely on ultrastructural analyses (Eleftheriou and Hall, 1983a; Findlay et al., 1971b;  
119 Kronstedt et al., 1986; Wergin et al., 1975). These studies indicate that at the time of nectar  
120 secretion, the cuticle separates from the cell wall on the terminal cells of the glandular  
121 trichome. Nectar then accumulates in the space between the cuticle and cell wall thereby  
122 generating hydrostatic pressure for the release of nectar as discrete droplets through the porous  
123 cuticle. It is unclear if the cell wall and cuticle undergo biochemical alterations to facilitate this  
124 process or if it is driven purely by physical force causing the cuticle to rupture.

125 In this study, we used a holistic approach to characterize the morphology,  
126 ultrastructure, and gene expression patterns of *G. hirsutum* floral and extrafloral nectaries as  
127 they develop from the pre-secretory to secretory to post-secretory stages. Gene expression data  
128 was also probed in the context of secreted nectar metabolomes, and to identify signatures of  
129 biochemical alterations in the cell wall and cuticle coinciding with facilitation of nectar  
130 secretion. Together these data were compared to the current eccrine-based model of nectar  
131 synthesis to assess for the first time whether this model is conserved among trichomatic and  
132 extrafloral nectaries.

### 133 **Results**

134 Domesticated Upland cotton, *G. hirsutum* (TM-1), develops four types of nectaries,  
135 three are extrafloral and one is floral, and all consist of multicellular glandular trichomes,  
136 specifically called papillae. The three extrafloral nectary types, foliar, bracteal, and  
137 circumbracteal, are subcategorized as vegetative or reproductive. The vegetative foliar nectary  
138 is located on the abaxial surface of the leaf midrib (Fig. 1A; Fig. 2A, B). The bracteal and

139 circumbracteal nectaries are reproductive extrafloral nectaries due to their close association  
140 with the flower. The bracteal nectaries, also referred to as the outer involucellar or subbracteal,  
141 develop at the base of each bract subtending the flower and framing the cotton boll (Fig. 1B;  
142 Fig. 2C, D). The circumbracteal or inner involucellar nectary occurs on the abaxial calyx  
143 surface alternate with the bracts (Fig. 1C; Fig. 2E, F). The floral nectary develops on the adaxial  
144 calyx surface and lines the basal circumference. The secretory papillae of the floral nectary  
145 subtend a ring of stellate trichomes (Fig. 2G, H).

#### 146 **General features of nectary epidermis and parenchyma**

147 The epidermis and parenchyma of all four nectary types were examined and compared  
148 at two developmental stages, pre-secretory and secretory. The nectary epidermal tissue  
149 contains two distinct regions, one bordering the papillae and the second directly below the  
150 papillae. Epidermal tissue bordering the papillae of each nectary are highly vacuolated (Fig.  
151 3D, E). In the floral nectaries and pre-secretory foliar nectaries, the boardering epidermal tissue  
152 contain bodies that stain heavily with Toluidine Blue and osmium tetroxide indicating the  
153 presecence of phenolics. These densely-staining bodies are  $21 \pm 8 \mu\text{m}$  in diameter. In contrast,  
154 the bracteal and circumbracteal nectaries lack the densely-staining bodies within the  
155 boardering epidermal tissue (Fig. 3A). The second region of epidermal tissue, the  
156 hypoepidermis located below the papillae, is characterized by densely-staining cytoplasm and  
157 the densely-staining bodies (Fig. 4B, D, F and H). At the pre-secretory stage, the extrafloral  
158 nectary hypoepidermis is vacuolated (Fig 4A, C, E), while the floral nectary hypoepidermis is  
159 not vacuolated and instead contains a dense-staining cytoplasm (4G).

160 The nectariferous parenchyma of all nectary types, located between the  
161 subnectariferous parenchyma and the secretory papillae, is characterized by isodiametric cells

162 with minimal intercellular spaces, and containing diminutive phenolic bodies, and densely-  
163 staining cytoplasm. The number of nectariferous parenchyma layers vary among the nectary  
164 type and developmental stage. The foliar, bracteal, and circumbracteal nectaries, at the pre-  
165 secretory stage contain three to four layers of nectariferous parenchyma (Fig. 3A, D, G). This  
166 number of cell-layers is maintained at the secretory stage in the bracteal and circumbracteal  
167 nectaries (Fig. 3E, H) but increases up to six layers in the foliar nectary (Fig. 3B). The number  
168 of nectariferous parenchyma cell-layers of the floral nectary varies depending on the position  
169 within the nectary. At both developmental stages, the proximal end contains three to four cell-  
170 layers (Fig. 3K) and the number of cell-layers decreases to two at the far distal end (Fig. 3L).

171 The subnectariferous parenchyma is composed of approximately ten layers of large  
172 cells with intermediate cytoplasm density as compared to the nectariferous parenchyma.  
173 Vascular bundles are present near the subnectariferous parenchyma with phloem rays  
174 extending into the subnectariferous parenchyma of the foliar nectary exclusively (Fig. 3C).  
175 The subnectariferous parenchyma of all examined nectary types develop densely-staining  
176 bodies, which occur more abundantly in cells surrounding the vascular bundles (Fig. 5).

177 Cells containing druses (spherical aggregates of calcium oxalate crystals) were  
178 primarily observed in the subnectariferous parenchyma of all nectary types, especially  
179 surrounding the vascular bundles. The druses present in foliar nectaries align in a row, in  
180 parallel to the phloem rays from the vascular bundles to the papillae (Fig. 3C). Druses were  
181 most abundant in the floral nectaries, occurring throughout the subnectariferous and  
182 nectariferous parenchyma (Fig. 3I, J).

183 Starch accumulation within the nectaries was visualized by PAS staining. Starch  
184 granules occur in the subnectariferous parenchyma of reproductive nectaries, floral, bracteal,

185 and circumbracteal. These are most commonly located near the vascular bundles of the  
186 bracteal and circumbracteal nectaries (Fig. 5C, E), and the frequency of these granules decrease  
187 as the nectaries transition from the pre-secretory to the secretory stages (Fig. 5D, F, I). Floral  
188 nectaries accumulate larger starch granules in the subnectariferous parenchyma at both stages  
189 of development with a slight decrease at the secretory stage (Fig. 5G, H, I). In contrast, virtually  
190 no starch granules were observed within the subnectariferous parenchyma of the foliar  
191 nectaries at either developmental stages (Fig. 5A, B, I).

### 192 **Morphological features of nectary papillae**

193 The papillae of all nectaries are multicellular and contain three regions typical of  
194 glandular trichomes; these being basal cell(s), stalk cells, and head cells. Mature extrafloral  
195 papillae contain five to six layers of cells with an average papillae-length of  $68 \pm 14 \mu\text{m}$  (SD),  
196 while the floral papillae are more extensive, with 12 to 14 cell layers with an average papillae-  
197 length of  $133 \pm 10 \mu\text{m}$  (SD) (Fig. 4B, D, E, H).

198 Regardless of papillae-length, each papilla begins with distinct basal cell(s), which lack  
199 electron-dense cytoplasm. The three types of extrafloral nectaries contain a single basal cell  
200 (Fig. 4A-F), while the floral nectary contains two basal cells (Fig. 4G,H; Fig. 7G). The stalk  
201 cells, characterized by phenolic bodies and vacuoles, determine the papillae length and width,  
202 and the circumbracteal nectaries have the widest papillae ( $46 \pm 6 \mu\text{m}$ ), as compared to the  
203 papillae of the other three nectaries ( $30 \pm 4 \mu\text{m}$ ) (Fig. 4I). The densely-staining bodies in the  
204 stalk cells of the bracteal and circumbracteal nectaries are arranged around the cell periphery  
205 (Fig. 4C-F).

206 The size and number of vacuoles differ among the different types of nectaries and their  
207 stages of development. Pre-secretory stalk and head cells of bracteal and circumbracteal



208 nectaries contain virtually no vacuoles (Fig. 4C, E), while at the secretory stage the distal two-  
209 thirds of the papillae cells become highly vacuolated, especially the head cells (Fig. 4D, H).  
210 In contrast to the bracteal and circumbracteal nectaries, the pre-secretory stalk and head cells  
211 of foliar and floral nectaries contain large, circular vacuoles in section (Fig. 4A, G), and by the  
212 secretory stage these vacuoles become smaller, and more numerous within the cells of the  
213 distal two-thirds of the papillae (Fig. 4B, H).

214         The cuticle and cell wall of the papillae have notable characteristics that are common  
215 among the four nectaries. These cuticles are thinnest around the head cell (Fig. 6G) and become  
216 thicker at the basal cell-epidermis junctions (Fig. 7G). Furthermore, in all four nectary types,  
217 at the secretory stage the cuticle of the head cells separates from the underlying cell wall and  
218 displays microchannels (Fig. 6). These microchannels are visible as slits on the outer surface  
219 of the papillae head cells (Fig. 6B, C). In the case of the bracteal and circumbracteal nectaries  
220 this separation of the cuticle occurs earlier in development, at the pre-secretory stage, and  
221 occasionally extends down to the distal stalk cells of bracteal papillae. Cell wall ingrowths  
222 toward the plasma membrane were observed in the bracteal and circumbracteal papillae head  
223 cells at the secretory stage (Fig. 6D, E). Occasionally an extensive periplasmic space is present  
224 in the bracteal stalk cells (Fig. 6F).

### 225 **Organelle composition**

226         The organelle composition of the papillae glands and supporting nectariferous  
227 parenchyma was examined by TEM. Cells of the papillae from all cotton nectaries are  
228 nucleated. The most common organelles observed in these cells are mitochondria, rough  
229 endoplasmic reticulum, and vesicles (Fig. 7C, D), whereas Golgi bodies (Fig. 7C) and  
230 amyloplasts (Fig. 7A) are significantly less abundant, and simple chloroplasts only occur in

231 the bracteal (Fig. 7E) and foliar (Fig. 7J) nectaries. Among the four types of nectaries, the  
232 cells of the floral nectary appears to have the most mitochondria, and among all the nectaries,  
233 the mitochondria are typically located around the cell periphery in close proximity to rough  
234 endoplasmic reticulum. The basal cells of the papillae glands appear to have higher organelle  
235 complexity, containing more mitochondria and rough endoplasmic reticulum per cell (Fig. 7E-  
236 H), while the head cells display the least organelle complexity (Fig. 6D, E, G, H). Throughout  
237 the papillae and nectariferous parenchyma, vesicle fusion to the plasma membrane was  
238 frequently observed (Fig. 7D), and typical of nectary tissue, plasmodesmata traverse the inner  
239 anticlinal and peridermal walls of these tissues (Fig. 7D, E, I, J).

#### 240 **Nectar metabolome**

241 Metabolomics analysis of the nectar from the four cotton types led to the detection and  
242 quantification of 197 analytes, with the successful chemical identification of 60 metabolites  
243 (Supplemental File 1). These latter metabolites include the dominant sugars, and the minor  
244 components, which are amino acids, sugar alcohols, lipids, diols, organic acids, esters, and  
245 aromatics.

246 The major constituents of the four nectars are similar, being hexose-dominant, with an  
247 equal molar ratio of fructose:glucose (Table 1). However, the four different nectar types can  
248 be distinguished based on the minor nectar metabolites, particularly between the floral and the  
249 extrafloral nectars (Supplemental Fig. 1 and 2). Variation between the three nectar categories  
250 is clearly illustrated by sucrose abundance, which differs significantly between floral,  
251 reproductive extrafloral, and vegetative extrafloral nectars (Table 1). These compositional  
252 variations are visualized by the pairwise volcano plots shown in Figure 8, which reveal that  
253 105 of the 197 detected analytes significantly differ in abundance in at least one pairwise

254 comparison ( $q$ -value  $< 0.05$ , Supplemental File 2). The floral nectar is compositionally distinct  
255 from the extrafloral nectars, with at least 77 distinguishing analytes between each extrafloral  
256 nectar from the floral nectar (Fig. 8A-C). Specifically, the amino acids are more abundant in  
257 the floral nectar (Table 1; Supplemental Fig. 2, Cluster 8), particularly aspartic acid,  
258 asparagine, leucine, phenylalanine, tryptophan, and gamma-aminobutyric acid (GABA)  
259 occurring exclusively in the floral nectar (Supplemental Fig. 1; Supplemental File 2). The other  
260 distinguishing compositional difference among these amino acids is the finding that the  
261 extrafloral nectars are less abundant in non-proteinaceous and essential amino acids  
262 (Supplemental Fig. 3).

### 263 **Mass spectrometric imaging of nectary metabolite distribution**

264 The application of MALDI-based mass spectrometric imaging technology on the four  
265 nectary types at two developmental stages (pre-secretory and secretory), resulted in the  
266 detection of over 7,000 ion-analytes, each of which are distinguishable by their unique  $m/z$   
267 values. This dataset was refined by applying two selection filters in order to reduce the number  
268 of ion-analytes and begin the process of identifying the chemical nature of each ion. One of  
269 these filters evaluated the “reliability” of ion-detection from nectar tissue associated pixels.  
270 Namely, ions that were detectable in 5 out of 10 near-adjointing pixels, which were positioned  
271 over papillae gland or nectariferous parenchyma nectar tissues were were considered reliable  
272 and were retained. The second filter compared the ion-strengths of each ion from tissue  
273 associated pixels to the signal strength obtained from non-tissue pixels, retaining only those  
274 ions that showed 2-times greater signal strength from tissue-pixels compared to background  
275 signal obtained from pixels devoid of tissue. Implementing these criteria reduced the dataset  
276 to 161 analytes of distinct  $m/z$  values. The distribution of these 161 analytes across the nectary

277 tissues is not uniform, indicating the heterogeneity in the metabolic status of the cells within  
278 each nectary (Supplemental Fig. 4). The chemical nature of 101 of these ions were tentatively  
279 identified (Supplemental File 3) based on the accurate mass of each ion ( $\Delta\text{ppm} \leq 8$ ), as  
280 compared to entries in the METLIN chemical database (<https://metlin.scripps.edu>).  
281 Approximately 60% of these tentatively identified analytes are phenolic type metabolites, and  
282 they are localized near the vasculature within the subnectariferous parenchyma and the  
283 epidermis (Fig. 9). This distribution matches the distribution of subcellular bodies that stain  
284 heavily with osmium tetroxide and are visualized by TEM (Fig. 7), confirming their identity  
285 as polyphenolic compounds.

#### 286 **RNA sequencing and differential expression analyses**

287 The transcriptomes of the four cotton nectary types were resolved through three  
288 development stages using RNA-seq. Over 360M sequencing reads (125 bp, paired end) were  
289 generated from RNA isolated from the four cotton nectaries and from the adjacent non-nectary  
290 control tissue. These reads were initially mapped to the UTX-JGI *G. hirsutum* genome (v1.1)  
291 and subsequently mapped to *Arabidopsis thaliana* Col-0 genome. The latter was selected  
292 because the *Arabidopsis* genome is well annotated and has served as the genetic model for  
293 plant biology, including the process of nectar production [reviewed in (Roy et al., 2017)]  
294 (Supplemental File 4).

295 The DESeq statistical package (Anders and Huber, 2010) was used to identify  
296 differentially expressed genes between each nectary type and the adjacent non-nectary control  
297 tissue, and these were also compared to evaluate the effect of development on each nectary  
298 type (Supplemental File 5 and 6). These analyses revealed genes that are differentially

299 expressed among the four nectaries at each specific stage of maturation, and those that are  
300 commonly nectary-enriched, irrespective of the four nectary types (Fig. 10).

301 Expression profiles identified via RNA-seq analysis were validated by quantitative real  
302 time PCR (qRT-PCR) analysis using RNA isolated from floral and bracteal nectaries. These  
303 validation genes were chosen based on their known or suspected functionality in nectary  
304 development (Kram et al., 2008; Lin et al., 2014; Ruhlmann et al., 2010; Solhaug et al., 2019).  
305 Some of the selected genes display distinctive differential expression during nectary  
306 development, while others show a more stable expression pattern (e.g., *NiR1*). The qRT-PCR  
307 expression data for these six selected genes were compared to the RNA-Seq expression values  
308 obtained from the floral and bracteal nectaries from different developmental stages. Pearson's  
309 correlation analysis of these two datasets leads to the finding of a strong positive correlation  
310 between these two methods of measuring gene expression ( $R^2 = 0.83$ ; Fig. 10). Therefore these  
311 validations indicate that the RNA-seq analyses can be used to draw conclusions concerning  
312 gene expression activity in developing nectary tissues.

313 A total of 3,340 genes displayed differential expression patterns between the nectary  
314 tissue and the adjacent non-nectary control tissue for at least one pairwise comparison (grey  
315 data-points in Figure 11A). These genes however, did not demonstrate any temporal change  
316 in expression during the development of each nectary-type. A summary of these genes and  
317 their occurrence among the four nectary types is visualized as a Venn diagram in Fig. 11B  
318 (Supplemental File 7). Gene ontology analysis of these genes that are commonly differentially  
319 expressed between nectary and non-nectary tissues among all four nectary types reveals an  
320 enrichment for molecular functions and biological process terminologies related to  
321 oxidoreductase activities, which are consistent with the need to generate nectar precursor

322 metabolites and cellular energetics (Supplemental File 8). We surmise therefore these are basal  
323 functionalities that are commonly required in maintaining an operational nectary.

324         The numbers of genes displaying a temporal change in expression, from pre-secretory  
325 to secretory to post-secretory stages associated with each nectary type are identified as red  
326 data-points in the scatter plots shown in Figure 11A (Supplemental File 6). Each scatter plot is  
327 divided into quadrants detailing the following four temporal patterns of gene expression  
328 relative to the secretory stage: 1) down-regulated at the pre-secretory stage and up-regulated  
329 at the post-secretory stage (preD-postU); 2) up-regulated at the pre-secretory stage and up-  
330 regulated at the post-secretory stage (preU-postU); 3) up-regulated at the pre-secretory stage  
331 and down-regulated at the post-secretory stage (preU-postD); and 4) down-regulated at the pre-  
332 secretory stage and down-regulated at the post-secretory stage (preD-postD). The Venn  
333 diagrams in Figure 11C (Supplemental File 9) identify the number of genes that share common  
334 temporal patterns of gene expression among the four nectary types.

335         These comparisons indicate that each nectary type displays a distinct temporal program  
336 of gene expression as they develop from pre-secretory to post-secretory stages. For example,  
337 there is only a single gene, terpene synthase 21 (AT5G23960.2), which shares the same  
338 temporal expression pattern across all four nectary types. Analogously, the bracteal and  
339 circumbracteal nectaries display temporal gene expression profiles that are most similar to each  
340 other (sharing 17% of the differentially expressed genes), while the floral and vegetative foliar  
341 nectaries are most distinct (sharing only 0.02% of the differentially expressed genes).

342         Enrichment of gene ontology terms provided functional insights on these differentially  
343 expressed genes (Supplemental File 10), and these identified broad categories of biological  
344 components and processes that are shared among the nectary types. For example, during the

345 development of floral, bracteal, and circumbracteal nectaries those genes that share the preU-  
346 postD and preD-postD temporal expression patterns are enriched for components that are  
347 integral plasma membrane proteins. In the bracteal nectary, genes belonging to the preU-postD  
348 temporal expression pattern are also enriched for catabolic processes related to lipid and pectin  
349 metabolism. The remaining terms lacked informative capacity as they are overly enriched in  
350 non-descript annotations, such as “response to stimulus.”

### 351 **Expression of carbohydrate metabolism and transmembrane transport genes related to** 352 **nectar production**

353 Because nectar production is heavily dependent on sugar metabolism (Ren et al., 2007;  
354 Solhaug et al., 2019) and sugar transport, the RNA-seq data were annotated with respect to  
355 starch and sucrose metabolic pathways and transmembrane transporters, using MapMan  
356 (Thimm et al., 2004) and gene ontology terms. The resulting gene list was further filtered,  
357 selecting those genes that are upregulated in the nectary transcriptomes relative to the adjoining  
358 control non-nectary transcriptomes. A secondary filter was also applied to select those genes  
359 that display developmental stage-dependent differential expression within a specific nectary.  
360 Figure 12 illustrates as a heat map, the temporal expression patterns of the 20 selected genes  
361 relative to the secretory stage among the four different nectaries (Supplemental File 11). The  
362 sequential order of these genes in Figure 12 is in order of their functionality in the eccrine-  
363 based model of nectar secretion [reviewed by (Roy et al., 2017)].

364 Consistent with the metabolic events predicted by the eccrine model of nectar  
365 production, the floral nectary displays gene expression patterns starting with the upregulation  
366 of *SS2* (*Starch Synthase 2*) at the pre-secretory stage, followed by the higher expression of  
367 *BMY3*, *SUS4*, *SWEET9*, and *CWINV4* during the secretory stage. In the bracteal and

368 circumbracteal nectaries the expression profiles of these genes deviate from the floral nectary  
369 profile. Namely, *BMY3* expression is relatively constant through development, whereas both  
370 *SUS4* and *RS5*, involved in sucrose synthesis, are highly expressed during the secretory stage,  
371 along with the sugar:proton symporters, *SUT2*, *STP1*, *STP13*, and *STP14*, and a UDP-galactose  
372 antiporter (AT5G59740). Thus, these sugar transporters may contribute to the export of sugars  
373 during nectar secretion, in addition to *SWEET9*. The expression patterns of these genes in the  
374 foliar nectary do not align with the expectation of the eccrine-based model; the exception being  
375 the peak expression by *SS2* and a putative galactose-1-phosphate uridylyltransferase  
376 (AT5G18200) during the pre-secretory stage of development.

377       Being primarily secretory organs, the nectary transcriptomes are enriched in  
378 differentially expressed transmembrane transporters. These include 79 differentially expressed  
379 transporters that are predicted to transport sugars, amino acids, water, and various ions (borate,  
380 phosphate, hydrogen, calcium, chloride, iron, potassium, and zinc) (Supplemental File 11). As  
381 would be expected, the expression of these transporter-coding genes generally peaks during  
382 the secretory stage of nectary development (27% of foliar, 39% of floral, 81% of bracteal, and  
383 86% of circumbracteal; Supplemental Fig. 5). Transporters that commonly show peak  
384 expression at either the pre-secretory or secretory stage of all four nectary types include those  
385 needed for the movement of water via plasma membrane intrinsic proteins (AT2G37170,  
386 AT3G53420, AT2G45960). In contrast, the amino acid transporters, *PROT1* (AT2G39890),  
387 AT1G47670, and AT3G56200, show temporal differential expression during the development  
388 of floral, bracteal and circumbracteal nectaries, but not in the foliar nectary (Supplemental File  
389 11 and Supplemental Fig. 5).

390



## 391 **Upregulation of nitrogen assimilation and amino acid biosynthesis within nectaries**

392 Analysis of the transcriptome data indicate that the floral, bracteal and circumbracteal  
393 nectaries display upregulated expression of genes associated with nitrogen assimilation during  
394 the secretory stage of development. These genes encode functionalities associated with nitrate  
395 transport to the nectary tissue (nitrate transporter *NRT1.5*, AT1G69850), reduction of nitrate  
396 to ammonium (nitrate reductase *NR2*, AT1G37130 and nitrite reductase *NIR1*, AT2G15620),  
397 and the fixation of ammonium to glutamate by a glutamine synthase (*GLN1*, AT5G37600)  
398 (Fig. 12; Supplemental File 11). In foliar nectaries not all of these genes are upregulated, and  
399 those whose expression is modulated (for the transport of ammonium and nitrate, by *TIP2;1*  
400 (AT3G16240) and *NRT1.2* (AT1G69850), respectively), peak expression occurs during the  
401 secretory stage of development.

402 With amino acids being the second most abundant class of nectar metabolites we  
403 examined the nectary transcriptomes for genes associated with amino acid biosynthesis, using  
404 MapMan (Thimm et al., 2004) and AraCyc (Mueller et al., 2003). Using the filtering criteria  
405 described for the transmembrane transporters, we identified a set of gene products that use  
406 glutamate as a substrate for the biosynthesis of amino acids. These genes that function  
407 primarily in the biosynthesis of alanine, aspartate, glycine, and branched chain amino acids,  
408 show peak expression during the secretory stage of the floral, bracteal and circumbracteal  
409 nectaries; aspartate being the prominent amino acid in these nectars. (Fig. 13).

## 410 **Cell wall and lipid metabolism during nectar secretion**

411 As indicated by the morphological studies of the nectary papillae, we anticipated that  
412 genes associated with cell wall and cuticle deposition may show altered expression during  
413 development. Such genes were selected based on the spatial and temporal differential

414 expression patterns as revealed by the RNA-seq data, and they were mapped to metabolic  
415 networks using MapMan (Thimm et al., 2004). Consistent with expectations, these analyses  
416 indicate that during bracteal and circumbracteal nectary development cell wall and cuticle  
417 associated genes display temporal differential expression, but this is not the case for floral and  
418 foliar nectaries (Supplemental Figs. 6 & 7; Supplemental File 11). Specifically, in both bracteal  
419 and circumbracteal nectaries eight genes related to cell wall re-structuring showed statistically  
420 significant upregulation during the secretory stage; these include an expansin (*EXL1*,  
421 *AT3G45970*), and genes required for the synthesis of cell wall components such as callose  
422 (*GSL10*, *AT3G07160*), hemicellulose (*GALT6*, *AT5G62620*), and pectins (*PME17*,  
423 *AT2G45220*). Likewise, 17 genes related to cuticular lipid metabolism, including fatty acyl  
424 elongation, transport of lipids, including cutin (*ABCG11*, *AT1G17840*) are commonly  
425 upregulated in these two nectary-types.

## 426 **Discussion**

427 This study represents the first system-based comparison of the four nectary types of *G.*  
428 *hirsutum*. Specifically, we compared and contrasted the nectary morphologies, nectary  
429 transcriptomes, and nectar metabolomes of the floral, bracteal, circumbracteal, and foliar  
430 nectaries of cotton. These data build upon genetic models for nectar production developed  
431 primarily using floral nectaries of *Arabidopsis* and *Nicotiana* spp., which are nectary tissues  
432 containing modified stomata, referred to as ‘nectarostomata’ (Bender et al., 2012, 2013, Carter  
433 et al., 1999, 2006, 2007, Carter and Thornburg, 2000, 2004; Hampton et al., 2010; Kram and  
434 Carter, 2009; Lin et al., 2014; Liu and Thornburg, 2012; Ren et al., 2007; Ruhlmann et al.,  
435 2010; Thomas et al., 2017; Thornburg et al., 2003; Wiesen et al., 2016). Thus, this study  
436 evaluates the applicability of the nectar production model developed from studies of floral

437 nectaries to extrafloral nectaries, and nectaries that are composed of secretory trichomes  
438 (papillae). The study revealed metabolic processes that are temporally regulated as these  
439 papillae nectaries progress from pre-secretion to secretion to post-secretion stages of  
440 development. Additionally, regulation of these metabolic processes varies among the three  
441 cotton nectary categories, floral, reproductive extrafloral, and vegetative extrafloral. Each of  
442 these nectaries have distinct patterns of nectar secretion, with the floral and reproductive  
443 extrafloral nectaries following a fixed ontogenetic pattern of secretion and the vegetative  
444 extrafloral nectary displaying low constitutive secretion, which is induced upon herbivory  
445 (Wäckers and Bonifay, 2004).

#### 446 **Morphology and ultrastructure of cotton nectaries**

447 Our studies expand upon earlier descriptions of the morphology and ultrastructure of  
448 the cotton foliar nectaries (Eleftheriou and Hall, 1983a; Wergin et al., 1975), and extends such  
449 studies to the floral nectary and the reproductive extrafloral nectaries (i.e., bracteal and  
450 circumbracteal). The four nectaries of *G. hirsutum* share the basic structural components of  
451 similar trichomatic nectaries reported in other taxa (*Abutilon* - Kronstedt et al., 1986;  
452 *Hibiscus* - Sawidis et al., 1987; *Platanthera* - Stpiczyńska et al., 2005; *Utricularia* - Plachno  
453 et al., 2018). Specifically, subnectariferous parenchyma is associated with vasculature. The  
454 nectariferous parenchyma is composed of small isodiametric cells with densely-staining  
455 cytoplasm, and closely packed papillae glands, which are composed of a single basal cell,  
456 variable number of stalk cells, and terminal head cells protruding from the epidermis  
457 (Bernardello et al., 2007; Eleftheriou and Hall, 1983a; Fahn, 1979; Findlay et al., 1971b;  
458 Kronstedt et al., 1986; Lattar et al., 2018; Sawidis et al., 1987; Wergin et al., 1975). Large  
459 phenolic ‘dense’ bodies and calcium oxalate crystals form in all four nectaries and based on

460 their postulated functionality in nectaries of other plant taxa, such as *Glycine*, *Linaria*,  
461 *Epipactis*, *Heliocarpus*, *Luehea*, *Ekebergia*, and *Anacardium*, they may confer protection from  
462 herbivory (Horner et al., 2003; Jachuła et al., 2018; Kowalkowska et al., 2018; Lattar et al.,  
463 2018; Tilney et al., 2018; Tölke et al., 2018).

464 The ultrastructure of nectariferous tissues reveals abundant ribosomes and a normal  
465 complement of organelles, including prominent rough endoplasmic reticulum, abundant  
466 mitochondria, scarce plastids, and few Golgi bodies. The abundance of rough endoplasmic  
467 reticulum positioned parallel to the cell walls may contribute to vesicle trafficking between  
468 cells in support of the granulocrine model of nectar secretion (Eleftheriou and Hall, 1983a).  
469 Pit fields of plasmodesmata traverse the cell walls of the nectariferous parenchyma and the  
470 inner anticlinal and peridermal walls of the papillae. This distribution of plasmodesmata  
471 supports symplastic flow of pre-nectar metabolites, such as sugars, from the associated  
472 vasculature to ultimate secretion of nectar from the papillae head cells (Eleftheriou and Hall,  
473 1983a; Findlay et al., 1971a; Wergin et al., 1975). In contrast to the previous studies of foliar  
474 nectaries, cell wall ingrowths were observed during the secretory stage of bracteal and  
475 circumbracteal nectaries on the distal cell wall of the papillae head cells. These ingrowths in  
476 the region of nectar secretion, may facilitate nectar secretion by increasing the surface area  
477 (Fahn, 1979; Plachno et al., 2018), which may be particularly important for the reproductive  
478 extrafloral nectaries that produce the largest volume of nectar and are active for the duration  
479 of fruit maturation (Wäckers and Bonifay, 2004).

480 During active nectar secretion, the cuticle of the papillae head cells separates from the  
481 cell wall and the newly formed subcuticular space, which fills with nectar; microchannels or  
482 fractures develop in the cuticle to facilitate the release of nectar from the nectary. This

483 phenomenon commonly occurs in the trichomatic nectaries of a variety of other species,  
484 included within Malvaceae (Findlay et al., 1971b; Haratym and Weryszko-Chmielewska,  
485 2017; Kowalkowska et al., 2018; Kronestedt et al., 1986; Lattar et al., 2018; Plachno et al.,  
486 2018; Sawidis et al., 1987). Based on previous observations of *Abutilon hybridum* floral  
487 nectary papillae, the cuticular channels may function as valves, releasing discrete droplets of  
488 nectar once hydrostatic pressure exceeds a threshold (Findlay et al., 1971b).

#### 489 **Nectar metabolomes reflect the feeding preferences of target facultative mutualists**

490         The distinct nectars produced by *G. hirsutum* floral and extrafloral nectaries parallel  
491 the feeding preferences of the pollinating mutualists visiting the floral nectary (honey bees)  
492 and the protective mutualists visiting extrafloral nectaries (ants). This variation between floral  
493 and extrafloral nectars has previously been reported for a number of species that produce both  
494 nectar types on a single plant (Baker et al., 1978). Furthermore, our finding of a unique  
495 metabolite profile of floral nectar agrees with prior studies (Butler et al., 1972; Gilliam et al.,  
496 1981; Hanny and Elmore, 1974). Specifically, reflecting the known feeding preference of bees  
497 (Baker and Baker, 1983; Waller, 1972), which visit cotton flowers, the floral nectar is the most  
498 hexose-rich cotton nectar type, containing minimal sucrose, and has the highest abundance and  
499 widest variety of amino acids. We also identified GABA as a non-proteinaceous amino acid  
500 unique to floral nectar. Based on the fact that phenylalanine and GABA are known to elicit a  
501 strong phagostimulatory response in bees, the presence of these floral nectar-specific amino  
502 acids may function to attract this pollinator (Hendriksma et al., 2014; Nepi, 2014; Petanidou  
503 et al., 2006). GABA may also confer health benefits for bees as GABA-enriched artificial  
504 nectar has been shown to increase the locomotion and survival time of bees (Bogo et al., 2019).  
505 Leucine and tryptophan may also provide a desirable flavor due to stimulation of sugar

506 chemosensory cells (Shiraishi and Kuwabara, 1970). Lastly, proline was the fourth most  
507 abundant amino acid of floral nectar, which is particularly important for bees by providing a  
508 rapid energy source for initial flight take-off (Carter et al., 2006; Teulier et al., 2016).

509         The extrafloral nectars, which function as a reward for mutualist ants, are characterized  
510 by higher sucrose content, and a broader distribution of amino acids, which are at lower  
511 abundance levels than in floral nectar. These characteristics reflect ant feeding preferences for  
512 carbohydrate sources rich in fructose and glucose to sustain worker ant metabolism, which also  
513 contain complex mixtures of amino acids, proposed to provide flavor and dietary nitrogen  
514 (Blüthgen and Fiedler, 2004; Dussutour and Simpson, 2009; Lanza, 1988). Similar to the floral  
515 nectar, extrafloral nectars also contain a high proportion of proline relative to the other amino  
516 acids, albeit at a concentration ten-fold less than the floral nectar; proline accounts for 9% to  
517 12% of the amino acids of extrafloral nectar (the fourth most abundant), and accounting for  
518 22% of the amino acids of vegetative extrafloral nectar (the second most abundant in this  
519 nectar). The biological effects of proline on ants remains unexplored, but a survey of ant food  
520 sources identified proline as the most abundant amino acid (Blüthgen et al., 2004). A final  
521 feature which separates extrafloral nectars from floral nectar is the high proportion of non-  
522 proteinaceous amino acids largely composed of  $\beta$ -alanine (i.e. 6% to 20% in extrafloral nectar,  
523 compared to 0.05% of floral nectar). In addition to the sugar and amino acids, these nectars  
524 also contain lipids (Stone et al., 1985), but their role in attraction of mutualists is not clear.

### 525 **Nectary capacity for *de novo* amino acid synthesis and transport**

526         As evidenced by the upregulation of the core genes required for nitrogen assimilation,  
527 nectaries of cotton, particularly the floral and reproductive extrafloral nectaries, exhibit the  
528 capacity to reduce nitrate and incorporate ammonium into organic forms. Specific genes

529 associated with these processes include: nitrate transporters (*NRT1.5*, *NRT1.2*), nitrate  
530 reductase (*NR2*), nitrite reductase (*NIR1*), ammonium transporter (*TIP2-1*), glutamine synthase  
531 (*GLN1*), and glutamate synthase (*GLT1*, *GLU1*) [reviewed by (Dechornat et al., 2010)]. While  
532 nitrogen assimilation commonly occurs in roots, it also occurs in shoots where photosynthesis  
533 can provide energy (Lin et al., 2008; Meyer and Stitt, 2001), but there are no previous reports  
534 of these processes occurring in nectaries.

535         Based on these transcriptomic profiles, one can surmise that nitrate is initially  
536 transported through the xylem to the subnectariferous parenchyma by the cotton orthologs of  
537 the proton-coupled nitrate transporter *NRT1.5* (Lin et al., 2008; Tsay et al., 2007). Once in the  
538 subnectariferous parenchyma, nitrate undergoes two successive reductions to produce  
539 ammonium, which is used to assemble glutamine by glutamine synthase (*GLN1*). Glutamate  
540 synthase (*GLU1* and *GLT1*) catalyzes the reaction of glutamine with 2-oxoglutarate to form  
541 glutamate [reviewed by (Bernard and Habash, 2009)]. Ammonium flux maybe modulated by  
542 the tonoplast localized ammonium uniporter *TIP2;1*, a gene upregulated in secretory  
543 reproductive extrafloral nectaries (Loque et al., 2005).

544         Nectary transcriptome data also revealed an upregulation of genes associated with  
545 amino acid biosynthesis and amino acid transporters, which are up-regulated at the pre-  
546 secretory and secretory stages of nectary development. These changes in expression are  
547 consistent with the amino acid profiles of the secreted nectars. For example, expression of  
548 *aspartate aminotransferase 3* (*ASP3*, AT5G11520) was highest among all nectaries, at the pre-  
549 secretory and secretory stages. This enzyme utilizes the glutamate, produced via ammonium  
550 assimilation, to convert oxaloacetate to aspartic acid, one of the most abundant amino acids of  
551 floral and extrafloral nectars.

552 Other such correlations between nectar amino acids and biosynthetic enzymes include  
553 phenylalanine and the biosynthetic enzyme, arogenate dehydratase 2 (*ADT2*, AT3G07630),  
554 and proline and the proline transporter *PROT1* (AT2G39890) (Yamada et al., 2011).  
555 Collectively therefore, these data suggest that cotton nectaries actively assimilate inorganic  
556 nitrogen into the amide moiety of glutamine, which functions as the amino group donor for  
557 synthesis of additional amino acids such as alanine, glycine, and branched chain amino acids.  
558 These amino acids can then undergo symplastic transport to the head cells of the papillae  
559 through the action of the upregulated amino acid transmembrane transporters culminating in  
560 deposition into the secreted nectars.

561 **Mechanisms of cotton nectar secretion supported by the transcriptome and papillae**  
562 **ultrastructure**

563 Multiple mechanistic models have been proposed for the biosynthesis of nectar  
564 components and release from trichomatic nectaries (Findlay et al., 1971b; Kronstedt et al.,  
565 1986; Paiva, 2016). These mechanisms must explain how the nectar components cross the  
566 barriers posed by the plasma membrane, cell wall, and cuticle. The potential complexity of this  
567 process is multiplied when considering the variation between floral and extrafloral nectaries  
568 which have contrasting patterns of nectar secretion and origins of pre-nectar metabolites (i.e.  
569 starch storage or lack thereof). The merocrine model (also called the granulocrine model) and  
570 the eccrine model are the two models that best align with transcriptomes and ultrastructure of  
571 the studied cotton nectaries. These two models likely function in coordination with each other  
572 to synthesize nectar components and secrete the metabolites from the nectary tissues. In the  
573 merocrine model, nectar metabolites are packaged into vesicles that fuse with the plasma  
574 membrane, releasing the nectar components. The eccrine model deviates from the merocrine,



575 in that nectar metabolites are ferried through the plasma membrane by channels and  
576 transporters [reviewed by (Roy et al., 2017)]. Currently, the eccrine model is best supported  
577 by molecular evidence from floral nectaries of Cucurbitaceae, Brassicaceae and Solanaceae  
578 that express five metabolic processes: 1) starch synthesis, 2) starch degradation, 3) sucrose  
579 synthesis, 4) export of sucrose into the apoplast via SWEET9, and 5) extracellular hydrolysis  
580 of sucrose by CELL WALL INVERTASE4 (CWINV4) (Chatt et al., 2018; Lin et al., 2014;  
581 Ruhlmann et al., 2010; Solhaug et al., 2019; Thomas et al., 2017). In both models, prior to the  
582 final release of nectar by vesicles or transporters, the pre-nectar metabolites move  
583 symplastically through the nectar parenchyma tissues.

584 The merocrine model is best supported when one considers the ultrastructural analyses  
585 of cotton nectaries. Specifically, the prominence of rough endoplasmic reticulum and  
586 abundance of vesicles that appear to be fusing to plasma membranes within the nectariferous  
587 parenchyma and throughout the papillae are consistent with the importance of vesicle  
588 movement to deliver nectar components through the parenchyma cells and out of the nectary  
589 papillae. In contrast, the transcriptome expression patterns during the development of floral  
590 and reproductive extrafloral nectaries support the eccrine model. Specifically, the expression  
591 of genes coding for enzymes and transporters associated with the five metabolic processes that  
592 support the biosynthesis and secretion of nectar components. The lack of such an expression  
593 pattern during the development of foliar nectaries may be a consequence of the fact that these  
594 nectaries produce a steady but low level of nectar, and thus there is no need for a change in a  
595 gene expression program that would provide evidence in support of the eccrine model of nectar  
596 production.

597           The upregulation of *SWEET9* and *CWINV4* at the secretory stages of nectary  
598 development is also supportive of the eccrine model, and the relative expression levels of these  
599 two genes appears to be predictive of whether the nectar product will be hexose-rich. As with  
600 Arabidopsis and pennycress nectaries (Bender et al., 2012; Kram et al., 2009; Lin et al., 2014;  
601 Ruhlmann et al., 2010; Thomas et al., 2017), which produce hexose-rich nectars, the expression  
602 of *SWEET9* and *CWINV4* at the secretory stage of cotton floral nectaries is near equal, and this  
603 nectary also produces the most hexose-dominant nectar of cotton. In contrast, the three cotton  
604 extrafloral nectaries produce nectars that are more sucrose enriched, and *CWINV4* expression  
605 is almost one-sixth the level of *SWEET9* expression. Similarly, such disproportionate  
606 expression of *SWEET9* and *CWINV4* has been reported in nectaries of pumpkin, squash, and  
607 sunflower, all of which produce sucrose-rich nectars (Chatt et al., 2018; Prasifka et al., 2018;  
608 Solhaug et al., 2019).

609           The eccrine model of nectar deposition has been primarily developed to explain the  
610 deposition of the sugar components of nectars. Similarly however, the expression of genes  
611 encoding for transporters of the minor components of the nectars would indicate that the  
612 eccrine model applies equally to these classes of metabolites. In support of this hypothesis,  
613 the transcriptomes of developing cotton nectaries reveals upregulated expression of plasma  
614 membrane- $H^+$ -ATPase, sugar:proton symporters, amino acid transporters, and lipid  
615 transmembrane transporters at the secretory stage of nectary development. The expression of  
616 such ATPase transmembrane transporters and proton gradients have previously been suggested  
617 to facilitate export of nectar metabolites (Bernardello et al., 2007; Chatt et al., 2018;  
618 Eleftheriou and Hall, 1983b; Peng et al., 2004; Vassilyev, 2010). Moreover, the occurrence of  
619 calcium oxalate crystals (druses) around the vasculature and throughout the nectary

620 parenchyma tissues may indicate the need to regulate calcium levels by sequestration as  
621 insoluble salts to negate the inhibitory effects of this cation on plasma membrane ATPases  
622 (Aguero et al., 2018; Kronstedt et al., 1986; Tölke et al., 2018).

623 Cotton nectar constituents are ultimately secreted from the papillae head cells, passing  
624 through the cell wall and cuticle. Our morphological and anatomical studies of reproductive  
625 extrafloral nectaries indicate that this passage is facilitated by microscopic physical alterations  
626 in the structure of the cell wall and cuticle. Consistent with the physical alterations of these  
627 polymeric structures, the expression of cell wall structural genes is upregulated, which likely  
628 contributes to the development of cell wall ingrowths on papillae head cells, increasing the  
629 surface area available for the secretion of nectar (Fahn, 1979; Kronstedt et al., 1986; Paiva,  
630 2016). The nectar that has passed through the cell wall appears to accumulate in the  
631 subcuticular space between the cell wall and cuticle, generating sufficient hydrostatic pressure  
632 to expand this interface, and ultimately be secreted through small pores and fractures in the  
633 cuticle. These actions may require the deposition of new cuticular lipids, which may be the  
634 driver for the upregulated expression of cuticle deposition genes.

635 In summary, our combined systems-level studies of the expression of *G. hirsutum* floral  
636 and reproductive extrafloral nectaries generated data that support a coordination of merocrine-  
637 based and eccrine-based models of nectar synthesis and secretion. The eccrine-based model  
638 was primarily developed from studies of eudicot floral nectaries. Therefore, this study has  
639 expanded the conservation of the eccrine model, for the first time, to extrafloral nectaries.

640

641

642

## 643 **Material and Methods**

### 644 **Plant materials**

645           Plants were grown in a Conviron Environmental Growth Chambers (0.7 m x 1.8 m x  
646 1.4 m) that was kept in a cycle of 12 h illumination at 26 °C starting at 6:00 local time, and 12  
647 h darkness at 22 °C. Seeds of *Gossypium hirsutum*, TM-1 were chipped and germinated in 8  
648 cm x 8 cm x 10 cm pots filled with a soil mixture of 3-parts LC8 soil ([www.sunagro.com](http://www.sunagro.com)) to 1-  
649 part sand. Individual seedlings were transplanted into 2-gallon (2A) pots after reaching  
650 approximately 30 cm in height, and 10 g of Osmocote Pro 19-5-8 ([www.amleo.com](http://www.amleo.com)) was  
651 mixed into the soil mixture per pot. Each growth chamber contained five plants. Plants were  
652 watered each day and once per week with a 10% fertilizer solution of Scotts Excel 21-5-20 all-  
653 purpose water-soluble fertilizer and Scotts Excel 15-5-15 Cal-Mag water soluble fertilizer  
654 ([www.jvkbmcmillian.com](http://www.jvkbmcmillian.com)).

### 655 **Collection of nectary and nectar samples**

656           All nectary and nectar samples were collected from plants after the first flower  
657 bloomed, approximately 70 days after sowing. Nectar samples were collected between 10 am  
658 and 3 pm local time, using a 5 µL Drummond® Microdispenser ([www.drummondsci.com](http://www.drummondsci.com)).  
659 Nectar samples were first harvested before nectary tissue was excised using a sterile scalpel.  
660 Nectary samples were collected from leaves or flowers immediately after removal of each  
661 organ from the plants, and the collected nectary tissues were immediately flash-frozen in liquid  
662 nitrogen and stored at -80 °C.

663           In this study, we analyzed four types of nectaries, the floral, bracteal, and  
664 circumbracteal nectaries collected from flowers, and foliar nectaries collected from leaves.  
665 The developmental trajectory of each nectary type was defined relative to nectar secretion, and

666 are defined as pre-secretory, secretory and post-secretory stages. Thus, in the case of floral  
667 nectaries these three developmental stages were collected at 24 h pre-anthesis, at anthesis, and  
668 at 24 h post-anthesis. The three equivalent developmental stages for bracteal and  
669 circumbracteal nectaries are defined as, a) the “match-head square stage” of cotton square  
670 development (Main, 2012), b) anthesis, and c) 19 to 24 days after anthesis. Analogously, the  
671 three developmental stages of foliar nectaries were collected from leaves with a midvein length  
672 of 5 to 6 cm, a midvein length of 12 to 15 cm, and fully mature leaves that lacked visible nectar  
673 deposits.

#### 674 **Non-targeted metabolomics analysis of nectar metabolites**

675 Two separate GC-MS based methods were employed for non-targeted metabolite  
676 profiling of nectar samples. Six replicate nectar samples were collected for each of the four  
677 nectar types. Each replicate consisted of pooled nectar, sampled from a minimum of 3 nectaries  
678 harvested from two plants on a single day.

679 One of these analysis methods provided data on the predominant sugars that constitute  
680 the nectar (i.e. sucrose, glucose, and fructose). Specifically, 1  $\mu\text{L}$  of nectar, spiked with an  
681 internal standard (10  $\mu\text{g}$  ribitol) was dried by lyophilization. The sample was methoximated at  
682 30  $^{\circ}\text{C}$  for 90 min, while continuously shaking with 20  $\text{mg mL}^{-1}$  methoxyamine hydrochloride  
683 dissolved in pyridine. The methoximated sample was silylated for 30 min at 60  $^{\circ}\text{C}$  with N,O-  
684 Bis(trimethylsilyl)trifluoroacetamide and 1% trimethylchlorosilane. Following dilution with  
685 1.5 mL pyridine, 1- $\mu\text{L}$  sample was analyzed by GC-MS. GC parameters were set to a helium  
686 gas flow rate of 1  $\text{mL min}^{-1}$ , 1  $\mu\text{L}$  injection with a 10:1 split, and a temperature gradient of 100  
687  $^{\circ}\text{C}$  to 180  $^{\circ}\text{C}$  increasing at a rate of 15  $^{\circ}\text{C min}^{-1}$ , then 5  $^{\circ}\text{C min}^{-1}$  to 305  $^{\circ}\text{C}$ , then 15  $^{\circ}\text{C min}^{-1}$   
688 to 320  $^{\circ}\text{C}$ , followed by a 5 min hold at 320  $^{\circ}\text{C}$ .

689           The second analysis method focused on the less abundant constituents of the nectar,  
690 which were extracted from a 5- $\mu$ L aliquot of nectar sample that was spiked with 0.5  $\mu$ g  
691 nonadecanoic acid and 1  $\mu$ g ribitol, as internal standards. Hot methanol (2.5 mL) was added to  
692 the nectar, and the mixture was incubated at 60 °C for 10 min. Following sonication for 10 min  
693 at 4 °C, chloroform (2.5 mL) and water (1.5 mL) were sequentially added, and the mixture was  
694 vortexed. Centrifugation separated the polar and non-polar fractions, and the entire non-polar  
695 fraction and half of the polar fraction was recovered to separate 2 mL screw-cap glass vials  
696 and dried by lyophilization. The polar fraction underwent methoximation as previously  
697 described, and both polar and non-polar fraction were silylated for 30 min at 60 °C with N,O-  
698 Bis(trimethylsilyl)trifluoroacetamide and 1% trimethylchlorosilane.

699           The derivatized metabolites (the sugars, polar, and non-polar fractions) were analyzed  
700 using an Agilent Technologies Model 7890A GC system equipped with an HP-5ms (30 m,  
701 0.25 mm, 0.25  $\mu$ m) column that was coupled to an Agilent Technologies 7683B series injector  
702 and Agilent Technologies Model 5975C inert XL MSD with Triple-Axis Detector mass  
703 spectrometer ([www.agilent.com](http://www.agilent.com)). Chromatography parameters for the polar and non-polar  
704 fractions were set to a helium gas flow rate of 1 mL min<sup>-1</sup>, 2  $\mu$ L injection, with a temperature  
705 gradient of 80 °C to 320 °C increasing at a rate of 5 °C min<sup>-1</sup>, followed by a 9 min hold at 320  
706 °C. The polar fractions were analyzed using a “heart-cut” method which diverted gas flow to  
707 an FID detector during elution times for fructose, glucose, and sucrose. Deconvolution and  
708 integration of resulting spectra were performed with AMDIS (Automated Mass Spectral  
709 Deconvolution and Identification System) software (Stein, 1999). Analyte peaks were  
710 identified by comparing mass spectra and retention indices to the NIST14 Mass Spectral  
711 Library and authentic standards when possible to confirm identification.

## 712 **Amino acid analysis**

713 Analysis of amino acids was performed using the Phenomenex EZ:Faast™ kit for free  
714 amino acids ([www.phenomenex.com](http://www.phenomenex.com)). Six replicate samples for each nectar type were  
715 collected as described previously. Due to low volume of nectar produced by the foliar nectary,  
716 these nectar samples were pooled from a maximum of 90 nectaries, collected from 6 separate  
717 plants. Each sample (20 µL nectar per extraction) was subjected to solid phase extraction and  
718 derivatized according to the manufacturer's instructions, with one adjustment: after addition  
719 of the norvaline internal standard (5 nmol) to each sample, 125 µL of 10% propanol/20 mM  
720 HCl was added to acidify the sample. Following derivatization, samples were concentrated by  
721 evaporation under a stream of nitrogen gas before amino acids were analyzed using an Agilent  
722 Technologies model 6890 gas chromatograph with a ZB-AAA 10 m x 0.25 mm amino acid  
723 analysis column coupled to a model 5973 mass selective detector capable of electrical  
724 ionization (EI). The GC-MS instrument settings followed the manufacturer's  
725 recommendations.

## 726 **Statistical analysis of cotton nectar metabolites**

727 For each metabolite, the natural logarithm of normalized metabolite level was averaged  
728 over the six replicates for each nectar type. Separately for each metabolite, a linear model with  
729 one mean per species and constant error variance was fitted to the metabolite response values.  
730 As part of each linear model analysis, F-tests for contrasts among the 4 nectar type means were  
731 conducted to identify differences in average response between each pair of nectar types. The  
732 197 p-values for each comparison (one p-value per metabolite) were adjusted to obtain  
733 approximate control of the false discovery rate at the 0.05 level (Benjamini and Hochberg,  
734 1995).

735 Similarities and differences among metabolites between different nectary types were  
736 visualized by pair-wise volcano plot comparisons and hierarchical agglomerative clustering.  
737 To perform clustering, the estimated nectar type response means were first standardized within  
738 each metabolite to obtain a standardized response profile across nectar types for each  
739 metabolite. Then dissimilarity between each pair of metabolites was computed as the Euclidean  
740 distance between the standardized response profiles. Clustering based on these pairwise  
741 dissimilarities places two metabolites in the same cluster if their estimated nectar type response  
742 means are highly correlated across sections. Although hierarchical clustering groups the  
743 metabolites into any number of clusters, a total of 16 clusters were selected to display and  
744 summarize the results, striking a balance between high within-cluster consistency and low  
745 between-cluster similarity.

#### 746 **Mass spectrometric imaging of nectary metabolites**

747 Nectary tissue was excised from plants and immediately embedded in a 2% solution of  
748 carboxymethylcellulose sodium medium viscosity in a disposable base mold (7 x 7 x 5 mm)  
749 and flash-frozen with liquid nitrogen. Triplicate samples of all four nectary types (floral,  
750 circumbracteal, bracteal, and foliar) at the pre-secretory and secretory stages were similarly  
751 prepared. Base molds were allowed to set at -20 °C for about 18 h, before 20 µm transverse  
752 cryosections were collected. During sectioning, the embedded tissue blocks were mounted on  
753 the cryostat using optimal cutting temperature compound, and sections were collected on 12  
754 mm carbon adhesive tabs (Electron Microscopy Sciences; cat. # 77825-12;  
755 [www.emsdiasum.com/microscopy/](http://www.emsdiasum.com/microscopy/)). Sections were dried for 1 h by lyophilization and visually  
756 imaged with a Zeiss AxioZoom ([www.zeiss.com](http://www.zeiss.com)). Well preserved sections were placed onto  
757 indium tin oxide coated glass slides 75 x 25 mm (Bruker, Billerica, MA; cat. #8237001;



758 www.bruker.com). Sections were then coated with a matrix using an oscillating capillary  
759 nebulizer sprayer (Hansen and Lee, 2017). The matrix was composed of 4 mL of 5 mg mL<sup>-1</sup>  
760 1,5-diaminonaphthalene dissolved in acetonitrile, 2 mL methanol, and 2 mL water, and it was  
761 applied at a rate of 4 mL h<sup>-1</sup> in 0.30 mL steps. After matrix application, samples were dried  
762 overnight in a desiccator.

763 MALDI-MS imaging was performed using a Bruker Solarix FT-ICR MS instrument  
764 equipped with a 7.0 tesla superconducting magnet. MALDI-MS data was acquired in negative  
765 ion mode with a mass range from  $m/z$  73 to 1000, collecting 2 megabytes of data points per  
766 scan. The laser was set to raster at 25  $\mu$ m spots, and *flexImaging* software (www.bruker.com)  
767 was used to collect and analyze the imaging data. Agilent MassHunter software and the  
768 METLIN Metabolomics Database and Library with ppm tolerance set to 8 were used to  
769 identify  $m/z$  values of interest.

#### 770 **Light microscopy and histochemistry**

771 Pre-secretory and secretory stage nectaries were fixed for several days at 4 °C, in a  
772 solution of 3% (w/v) glutaraldehyde and 2% (w/v) paraformaldehyde in 0.1M sodium  
773 cacodylate buffer, pH 7.2. Samples were dehydrated in a graded ethanol series (50% - 100%),  
774 followed by infiltration and embedding over five days in LR White resin. For replication  
775 purposes a minimum of four nectaries per nectary-type were imbedded at each developmental  
776 stage. Resin blocks were polymerized at 55 °C for 72 h. Histological sections were cut at 1.3  
777  $\mu$ m thickness using a Leica UC6 ultramicrotome (www.leica-microsystems.com). Sections  
778 were dyed with Toluidine Blue O for general contrast and Periodic Acid Schiff's (PAS)  
779 technique for starch and other water-insoluble carbohydrates (Ruzin, 1999). Digital images

780 were collected using a Zeiss Axiocam HRC camera ([www.zeiss.com](http://www.zeiss.com)) on an Olympus BX-40  
781 compound microscope ([www.olympus-ims.com](http://www.olympus-ims.com)) in bright-field mode.

## 782 **Transmission electron microscopy**

783 A minimum of four nectaries, of the four nectary types (foliar, bracteal, circumbracteal,  
784 and floral), harvested at the secretory stage, were fixed for several days at 4 °C, in a solution  
785 of 3% (w/v) glutaraldehyde and 2% (w/v) paraformaldehyde in 0.1 M sodium cacodylate  
786 buffer, pH 7.2. Samples were washed with several changes of 0.1 M sodium cacodylate buffer,  
787 pH 7.2, and then fixed in 1% osmium tetroxide in 0.1 M sodium cacodylate buffer for 1 h at  
788 room temperature. The samples were *en block* stained for 2 h with aqueous 2% uranyl acetate,  
789 and then dehydrated in a graded ethanol series (50% - 100%). Following a transition into ultra-  
790 pure acetone, and infiltrating, the nectaries were embedded with Spurr's hard epoxy resin  
791 ([www.emsdiasum.com](http://www.emsdiasum.com)). Resin blocks were polymerized for 48 h at 70 °C. Thick sections (1  
792 µm) to check fixation quality and ultrathin (90 nm) sections were made using a Leica UC6  
793 ultramicrotome ([www.leica-microsystems.com](http://www.leica-microsystems.com)). Ultrathin sections were collected onto  
794 carbon-film, single-slot copper grids and images were captured using a JEM 2100 200kV  
795 scanning and transmission electron microscope ([www.jeol.com](http://www.jeol.com)).

## 796 **Scanning electron microscopy**

797 A minimum of four nectaries per nectary type and at the pre-secretory and secretory  
798 stages of development, were fixed for several days at 4 °C in formalin-acetic acid-alcohol.  
799 They were dehydrated in a graded ethanol series (50%, 70, 95, 100, 100 ultra-pure twice).  
800 Samples were critical point-dried using a Denton Drying Apparatus, Model DCP-1  
801 ([www.dentonvacuum.com](http://www.dentonvacuum.com)). The dried specimens were mounted on aluminum stubs with 12  
802 mm circular carbon adhesive tabs and colloidal silver paint ([www.emsdiasum.com](http://www.emsdiasum.com)). Samples

803 were sputter coated with 30 nm platinum using a Cressington HR208 Sputter Coater  
804 (www.cressington.com). Images were captured using a Hitachi SU-4800 field emission SEM  
805 at 10 kV (www.hitachi-hightech.com).

#### 806 **RNA isolation, sequencing, and informatics**

807         Triplicate RNA samples were isolated for each of the nectary types. Each replicate was  
808 a pool of approximately 2-4 floral or 10-15 of each of the extrafloral nectaries. Tissue was  
809 transferred with clean forceps into a 2 mL Lysing matrix A tube (MP Biomedicals; Ref # 6910-  
810 500; www.mpbio.com), resting in a liquid nitrogen bath and containing a ceramic bead. The  
811 tubes were quickly transferred to a QuickPrep adaptor (containing dry ice) and attached to the  
812 FastPrep 24™-5G (www.mpbio.com) benchtop homogenizer for tissue-pulverization. The  
813 samples were subjected to 5-6 pulverization cycles of 40 sec each, at 6 m/sec, with each cycle  
814 interjected with a period of immersion in liquid nitrogen and refilling the adaptor with dry ice.  
815 Post-pulverization, 600 µL of the RNA lysis buffer of the Quick-RNA™ MiniPrep kit (Zymo  
816 Research; Cat# R1054; www.zymoresearch.com) was quickly added to the Lysing matrix tube  
817 and the tubes were vortexed. This was followed by the addition of 50 µL of the Plant RNA  
818 Isolation Aid (Thermo Fisher Scientific, Cat#AM9690; erstwhile Ambion) to remove common  
819 plant contaminants such as polyphenolics and polysaccharides. Quick-RNA™ MiniPrep kit  
820 directions were followed for RNA isolation. Agarose gel electrophoresis and UV  
821 spectrophotometry were used to assess RNA quality, prior to submission to the University of  
822 Minnesota Genomics Center for barcoded cDNA library creation and Illumina HiSeq 2500  
823 sequencing. This produced over 360 million 125-bp paired-end reads with a target insert size  
824 of 200 bp and generated  $\geq 24$  M reads for each sample, and the average quality scores were

825 above Q30. A few samples did not yield suitable sequencing libraries, and thus were omitted  
826 from the analysis.

827 The reads were mapped to the UTX-JGI *Gossypium hirsutum* genome (v1.1) and  
828 predicted transcripts using NCBI's BLASTN (Camacho et al., 2009). The UTX-JGI annotation  
829 was used to map read counts to Arabidopsis genes (Araport 11). Read counts were upper-  
830 quartile normalized, and pairwise differential expression tests were performed using a negative  
831 binomial distribution with DESeq (Anders and Huber, 2010). The resulting p-values were  
832 filtered by restricting to genes with a 50% or greater change in mean normalized counts. The  
833 Benjamini-Hochberg method was used to control the false discovery rate at the 0.05 level  
834 (Benjamini and Hochberg, 1995).

835 Differentially expressed genes were identified by filtering the DESeq results within R  
836 and categorized (e.g., upregulated during the secretory stage); these categories were visualized  
837 by generating Venn diagrams using InteractiVenn (Heberle et al., 2015). Gene Ontology (GO)  
838 enrichment analysis of the nectary transcriptome was implemented using topGO: Enrichment  
839 Analysis for Gene Ontology (Alexa and Rahnenfuhrer, 2016) with prior gene-to-GO term  
840 mapping completed using GO.db (Carlson, 2016). A Fisher's exact test was completed to test  
841 for enrichment of GO terms in specific expression pattern groups, using the complete set of  
842 16,958 Arabidopsis orthologs as the baseline for this comparison.

843 Mapping genes to metabolic pathways used MapMan (Thimm et al., 2004) with the  
844 base pathways and mappings files for Arabidopsis. Hierarchical clustering based on one minus  
845 Pearson correlation of the log<sub>2</sub> normalized read count of selected metabolic pathways or  
846 functionalities was completed using Morpheus (<https://software.broadinstitute.org/morpheus>).  
847

## 848 **Quantitative Real Time PCR Validation**

849           The same RNA samples used for RNA-seq analyses were subjected to cDNA  
850 preparation using the BioRad iScript cDNA synthesis kit (Catalog # 1708890), with 1 µg of  
851 RNA used for cDNA preparation. Expression patterns for representative genes that displayed  
852 stage specific variation via RNAseq analyses were validated by quantitative RT-PCR using  
853 Agilent Brilliant III Ultra-fast SYBR Green QPCR Master Mix (Catalog #600882) and a final  
854 cDNA template concentration of 2ng/µl. Expression values are expressed as fold-change  
855 relative to the presecretory stage and are based on the delta delta Ct values obtained from the  
856 normalized Ct values for each gene. Gene expression was normalized to a gene encoding a 40S  
857 ribosomal protein S3-2-like gene (Cotton gene ID= Gohir.D05G034300.1, 1). This gene was  
858 chosen as the internal reference based on its stable expression level in floral and bracteal  
859 nectary samples across stages in our RNA-seq dataset. Primer sequences for each gene are  
860 provided in Supplemental File 12.

## 861 **Data availability**

862           Raw sequence reads are available at the National Center for Biotechnology Information  
863 Sequence Read Archive under GEO accession number GSE113373. Metabolomics data is  
864 publicly available in the PMR database (<http://metnetweb.gdcb.iastate.edu/PMR/>).

## 865 **Acknowledgements**

866           We thank Drs. Ann Perera, Lucas Showman, and Kirthi Narayanaswamy of the W.M.  
867 Keck Metabolomics Research Laboratory, Iowa State University for technical support in  
868 metabolomics analyses. We are grateful to Tracey P. Stewart and Randall Den Adel, of the  
869 Roy J. Carver High Resolution Microscopy Facility, Iowa State University for technical  
870 support in microscopic analyses. We also thank Dr. Daniel S. Nettleton and Xingche Guo for

871 conducting hierarchical cluster analysis of metabolomics data and Anthony Schmitt for  
 872 assistance with RNA preparation. This work was supported by the National Science  
 873 Foundation award #IOS 1339246 to BJN and CJC.

874 **Tables**

875 **Table 1** | Predominant sugars, and amino acids in *G. hirsutum* nectars. Different superscript  
 876 letters indicate statistically significant differences in abundance (q-value < 0.05).

| Nectar Type    | Sugars (M)               |                          |                            | Fructose-to-glucose ratio | Sucrose-to-hexose ratio | Amino acids (μM) |               |                   |            |
|----------------|--------------------------|--------------------------|----------------------------|---------------------------|-------------------------|------------------|---------------|-------------------|------------|
|                | Fructose                 | Glucose                  | Sucrose                    |                           |                         | Essential        | Non-essential | Non-proteinaceous | Total      |
| Floral         | 1.81 ± 0.14 <sup>A</sup> | 1.89 ± 0.18 <sup>A</sup> | 0.005 ± 0.001 <sup>A</sup> | 0.97 ± 0.03               | 0.0014 ± 0.0004         | 116 ± 11         | 2950 ± 294    | 3.9 ± 1.2         | 3070 ± 303 |
| Bracteal       | 4.05 ± 0.32 <sup>B</sup> | 4.27 ± 0.32 <sup>B</sup> | 0.50 ± 0.06 <sup>B</sup>   | 0.95 ± 0.01               | 0.060 ± 0.005           | 12 ± 7           | 37 ± 12       | 5.7 ± 0.9         | 54 ± 20    |
| Circumbracteal | 4.3 ± 0.6 <sup>B</sup>   | 4.3 ± 0.7 <sup>B</sup>   | 0.37 ± 0.07 <sup>B</sup>   | 1.02 ± 0.03               | 0.040 ± 0.004           | 1.9 ± 0.4        | 21 ± 3        | 6.8 ± 2.8         | 30 ± 2     |
| Foliar         | 4.5 ± 0.4 <sup>B</sup>   | 4.2 ± 0.3 <sup>B</sup>   | 1.3 ± 0.1 <sup>C</sup>     | 1.10 ± 0.01               | 0.150 ± 0.003           | 11 ± 6           | 40 ± 13       | 3 ± 1             | 55 ± 15    |

877

878 **Figure Legends**

879 **FIGURE 1** | Extrafloral nectaries present on *G. hirsutum* leaves and flowers indicated by  
 880 arrow heads: the foliar nectary (**A**), bracteal nectary (**B**), and circumbracteal nectary (**C**).  
 881 Scale bar A = 5 mm; B, C = 10 mm.

882

883 **FIGURE 2** | Macrostructure of *G. hirsutum* nectaries at the secretory stage of development,  
884 viewed with a macrozoom microscope (A, C, E, G) and SEM (B, D, F, H). Extrafloral  
885 nectaries (A-F) are composed of a pit of densely packed papillae. Floral nectary (G, H) is  
886 composed of a ring of stellate trichomes (\*) subtended by a ring of papillae. (A, B) Foliar  
887 nectary; (C, D) Bracteal nectary; (E, F) Circumbracteal nectary; (G, H) Floral nectary. Scale  
888 bars = 0.5 mm

889 **FIGURE 3** | Light micrographs of *G. hirsutum* nectary longitudinal sections stained with  
890 Toluidine Blue O. (A) Foliar pre-secretory nectary; (B) Foliar secretory nectary; (C) Foliar  
891 secretory nectary, phloem rays extending into the subnectariferous parenchyma highlighted  
892 by arrow, arrow heads point to druse crystals; (D) Bracteal pre-secretory nectary; (E)  
893 Bracteal secretory nectary; (F) Bracteal secretory nectary nectariferous and subnectariferous  
894 parenchyma subtending the papillae, arrow heads point to druse crystals; (G) Circumbracteal  
895 pre-secretory nectary; (H) Circumbracteal secretory nectary; (I) Floral pre-secretory nectary,  
896 arrow heads point to druse crystals; (J) Floral secretory nectary, arrow heads point to druse  
897 crystals; (K) Proximal portion of floral secretory nectary; (L) Distal portion of floral  
898 secretory nectary. Abbreviations: ep = epidermis; np = nectariferous parenchyma; pf =  
899 phloem fiber; \* = hypoepidermis. Scale bars A, B, G, H, I, J = 100  $\mu\text{m}$ ; C, D, E, F, K, L = 50  
900  $\mu\text{m}$ .

901 **FIGURE 4** | Light micrographs of *G. hirsutum* papillae longitudinal sections from the four  
902 different nectary types stained with Toluidine Blue O and their dimensions. (A) Foliar pre-  
903 secretory; (B) Foliar secretory; (C) Bracteal pre-secretory; (D) Bracteal secretory; (E)  
904 Circumbracteal pre-secretory; (F) Circumbracteal secretory; (G) Floral pre-secretory; (H)  
905 Floral secretory; (I) Length and width distribution of the nectary papillae at different stages

906 of development. A total of 7 to 22 papillae were measured for each nectary type and at each  
907 developmental stage. Abbreviations: h = head cells; s = stalk cells; b = basal cells. All scale  
908 bars = 10  $\mu\text{m}$

909 **FIGURE 5** | Distribution of starch granules within subnectariferous parenchyma (regions  
910 within dashed boxes) during development of *G. hirsutum* nectaries visualized by PAS  
911 staining and light microscopy and their density. **(A)** Foliar pre-secretory; **(B)** Foliar  
912 secretory; **(C)** Bracteal pre-secretory; **(D)** Bracteal secretory; **(E)** Circumbracteal pre-  
913 secretory; **(F)** Circumbracteal secretory **(G)** Floral pre-secretory; **(H)** Floral secretory; **(I)**  
914 Density of starch granules within the subnectariferous parenchyma of *G. hirsutum* nectaries  
915 during nectary development. For each nectary type and developmental stage, starch granules  
916 were counted from a minimum of six sections originating from two separate nectaries. Error  
917 bars represent S.E. Abbreviations: VB = vascular bundle; FL = floral; B = bracteal; C =  
918 circumbracteal; FO = foliar. Scale bars = 100  $\mu\text{m}$ .

919 **FIGURE 6** | SEM (A-C) and TEM (D-I) images of the cuticle and cell wall of *G. hirsutum*  
920 nectary papillae. **(A)** Terminal end of papillae of circumbracteal nectary at pre-secretory  
921 stage, note lack of microchannels (cracks) in cuticle surface; **(B)** Circumbracteal nectary at  
922 secretory stage, arrow head identifies the microchannels in the cuticle surface; **(C)** Surface of  
923 a terminal cell from a foliar nectary papilla at secretory stage, arrowhead identifies the  
924 cuticular microchannels; **(D)** Head cell from secretory circumbracteal papilla; **(E)** Secretory  
925 bracteal papilla showing separated cuticle (c) with microchannels and cell wall ingrowths;  
926 **(F)** Two adjacent distal stalk cells from secretory bracteal papillae, note periplasmic space  
927 (pp); **(G)** Head cells from secretory floral papilla; **(H)** Secretory foliar papilla showing  
928 separated cuticle; **(I)** Porous cuticle of head cell of bracteal secretory papilla. Abbreviations:



929 c = cuticle; cw = cell wall; ss = subcuticular space; pp = periplasmic space. Scale bars A, B =  
930 25  $\mu\text{m}$ ; C = 50 nm; D, E, F = 2  $\mu\text{m}$ ; G, H = 5  $\mu\text{m}$ ; I = 1  $\mu\text{m}$

931 **FIGURE 7** TEM of the cellular details of *G. hirsutum* nectary papillae and supporting  
932 nectariferous parenchyma tissue at the secretory stage. (A) Stalk cells from bracteal nectary  
933 with amyloplast insert; (B) Stalk cell from foliar nectary; (C) Organelles of stalk cell  
934 exemplified by foliar nectary; (D) Plasmodesmata (arrowheads) in cell wall of internal stalk  
935 cell; (E-G) Junction between basal cell and nectariferous parenchyma of (E) bracteal nectary;  
936 (F) foliar nectary; (G) floral nectary; (H) Basal cell from circumbracteal nectary; (I)  
937 Nectariferous parenchyma from bracteal nectary; (J) Nectariferous parenchyma from foliar  
938 nectary. Arrowheads identify plasmodesmata. Abbreviations: am = amyloplasts; cl =  
939 chloroplast; b = basal cell; er = endoplasmic reticulum; Gb = Golgi body; m = mitochondria;  
940 n = nucleus; np = nectariferous parenchyma; pb = phenolic body; rer = rough endoplasmic  
941 reticulum; va = vacuole; vs = vesicle. Scale bars A, B, E - J = 2  $\mu\text{m}$ ; C = 1  $\mu\text{m}$ ; D = 0.5  $\mu\text{m}$ .

942 **FIGURE 8** | Volcano plot analyses of all possible pairwise comparisons of *G. hirsutum*  
943 nectar metabolomes. In each comparison, “significant ratio” identifies the proportion of the  
944 detected analytes whose abundance difference is statistically significant (colored data points  
945 above the y-axis value of 1.3) between the two nectar types. The chemical class identity of  
946 the metabolites is color-coded.

947 **FIGURE 9** | Spatial distribution of phenolic metabolites visualized by mass-spectrometric  
948 imaging. Each MS image was obtained from the longitudinal cryosections of *G. hirsutum*  
949 nectaries that were optically imaged in parallel (top row). The position of the vasculature is  
950 highlighted by red colored ovals in the optical images. The MS imaging data was collected  
951 with a laser spot size, enabling a 25- $\mu\text{m}$  spatial resolution of the metabolites. The ion signals

952 are scaled to the maximum signal of the highest spectrum. The scaled ion signals are  
953 displayed by the rainbow heat map coloration. Scale bars = 500  $\mu\text{m}$ .

954 **FIGURE 10** | Validation of RNA-seq data by parallel qRT-PCR analysis. Using the  
955 identical RNA samples subjected to RNA-seq analysis, the expression of 6 targeted genes  
956 was analyzed by qRT-PCR. These genes are: *CWINV4* (*Cell Wall Invertase 4*), *EXP1*  
957 (*Expansin1*); *NiR1* (*Nitrite reductase 1*); *LCAS4* (*long chain acyl-CoA synthetase 4-like*);  
958 *GDSL* (*GDSL-like Lipase/acylhydrolase*); and *SWEET9* (*Sugars Will Eventually be Exported*  
959 *Transporter 9*). Expression was evaluated during the development of floral and bracteal  
960 nectaries as they transition from pre-secretory (Pre) to secretory (Sec) and to post-secretory  
961 (Post) stages, and the data are expressed as fold-change relative to the pre-secretory stage.  
962 Error bars represent SE from a total of 3 biological replicates. The scatter plot displays the  
963 Pearson's correlation analysis between the RNA-seq and qRT-PCR datasets, expressed as  
964 fold-change in expression relative to the pre-secretory stage (on a log base-2 scale).

965 **FIGURE 11** | Differentially expressed genes in four nectary types. (A) Scatter plots  
966 displaying differentially expressed genes in relation to the development of each nectary from  
967 pre-secretory (Pre) to secretory (Sec) to post-secretory (Post) stages, normalized to the  
968 expression level at the secretory stage. Grey colored data points represent genes that are  
969 preferentially expressed in each nectary type with respect to the adjoining non-nectary tissue,  
970 but expression is minimally affected by nectary development. Red colored data points  
971 represent genes that are differentially expressed in each nectary type, and expression is also  
972 modulated by the development of each nectary type. These red data points are divided into  
973 four quadrants, which detail changes in gene expression patterns normalized to the secretory  
974 developmental stage: 1) down-regulated at the pre-secretory stage and up-regulated at the

975 post-secretory stage (preD-postU); 2) up-regulated at the pre-secretory stage and up-  
976 regulated at the post-secretory stage (preU-postU); 3) up-regulated at the pre-secretory stage  
977 and down-regulated at the post-secretory stage (preU-postD); and 4) down-regulated at the  
978 pre-secretory stage and down-regulated at the post-secretory stage (preD-postD). The number  
979 of differentially expressed genes in each sector is identified in the outer corner of each sector.  
980 **(B)** Venn diagram representation of the distribution of genes displaying nectary tissue  
981 preferential expression, but not modulated by the developmental stage of each nectary (i.e.,  
982 the genes identified by grey data-points in panel A). The digits identify the absolute number  
983 and percentage of genes falling into each subset category. **(C)** Venn diagram representation  
984 of the distribution of genes that show nectary-tissue specific expression and temporal patterns  
985 of gene expression as they transition through presecretory, secretory and post-secretory  
986 stages of development (i.e., overlap among the genes represented by red-colored data-points  
987 in panel A.) The digits identify the absolute number and percentage of genes falling into  
988 each subset category.

989 **FIGURE 12** | Expression analysis of genes involved in starch and sucrose metabolism.  
990 Normalized RNA-seq data was used to generate heat maps of changes in gene expression as  
991 each nectary-type transition from pre-secretory to secretory and from secretory to post-  
992 secretory stages of development. The blue-red color scale indicates the relative fold-change  
993 (FC) between these developmental transitions, on a logarithmic (base-2) scale. Full names for  
994 the abbreviations of individual genes are provided in Supplemental File 10. Abbreviations:  
995 FL = floral; B = bracteal; C = circumbracteal; FO = foliar; Pre = pre-secretory; Sec =  
996 secretory; Post = post-secretory

997 **FIGURE 13** | Integration of metabolomics and transcriptomics data to decipher the  
998 metabolic processes that support nitrogen assimilation and amino acid biosynthesis in  
999 nectaries. Each metabolic module (A-F) integrates metabolomics data of metabolic  
1000 intermediates and gene expression data of enzymes catalyzing key metabolic processes. The  
1001 “gene expression key” indicates the logarithmic (base-2) fold-change ( $\text{Log}_2\text{FC}$ ) between the  
1002 four nectary types as modulated by developmental transitions. Gene descriptions are  
1003 provided in Supplemental File 10. Data-bars labeled with the “<” symbol indicate metabolite  
1004 levels that are below the detection limit of the analytical method. Abbreviations: FL = floral;  
1005 B = bracteal; C = circumbracteal; FO = foliar; Pre = pre-secretory; Sec = secretory; Post =  
1006 post-secretory.

## 1007 **References**

- 1008 Agüero, J. I., Galati, B. G., and Torretta, J. P. (2018). Structure and ultrastructure of floral  
1009 nectaries of two *Opuntia* species (Cactaceae) in relation to their floral visitors. *Plant*  
1010 *Syst. Evol.* 304, 1057–1067. doi:10.1007/s00606-018-1531-2.
- 1011 Alexa, A., and Rahnenfuhrer, J. (2016). topGO: enrichment analysis for gene ontology. R  
1012 Packag. version 2.30.0. Available at:  
1013 <https://bioconductor.org/packages/release/bioc/html/topGO.html>.
- 1014 Anders, S., and Huber, W. (2010). Differential expression analysis for sequence count data.  
1015 *Genome Biol.* 11. doi:10.1186/gb-2010-11-10-r106.
- 1016 Baker, H. G., and Baker, I. (1983). “A brief historical review of chemistry of floral nectar,”  
1017 in *The Biology of Nectaries* (New York: Columbia University Press), 126–152.
- 1018 Baker, H. G., Opler, P. A., and Baker, I. (1978). A comparison of the amino acid  
1019 complements of floral and extrafloral nectars. *Bot. Gaz.* 139, 322–332.
- 1020 Bender, R., Klinkenberg, P., Jiang, Z., Bauer, B., Karypis, G., Nguyen, N., et al. (2012).  
1021 Functional genomics of nectar production in the Brassicaceae. *Flora* 207, 491–496.
- 1022 Bender, R. L., Fekete, M. L., Klinkenberg, P. M., Hampton, M., Bauer, B., Malecha, M., et  
1023 al. (2013). PIN6 is required for nectary auxin response and short stamen  
1024 development. *Plant J.* 74, 893–904.
- 1025 Benjamini, Y., and Hochberg, Y. (1995). Controlling the false discovery rate : A practical  
1026 and powerful approach to multiple testing. *J. R. Stat. Soc.* 57, 289–300.  
1027 doi:<https://doi.org/10.1111/j.2517-6161.1995.tb02031.x>.

- 1028 Bentley, B. L. (1977). Extrafloral nectaries and protection by pugnacious bodyguards. *Annu.*  
1029 *Rev. Ecol. Syst.* 8, 407–427.
- 1030 Bernard, S. M., and Habash, D. Z. (2009). The importance of cytosolic glutamine synthetase  
1031 in nitrogen assimilation and recycling. *New Phytol.* 182, 608–620.  
1032 doi:10.1111/j.1469-8137.2009.02823.x.
- 1033 Bernardello, G., Nepi, M., Nicolson, S. W., Pacini, E., Petanidou, T., and Thornburg, R. W.  
1034 (2007). *Nectaries and Nectar.*, eds. S. W. Nicolson, M. Nepi, and E. Pacini Springer.
- 1035 Blüthgen, N., and Fiedler, K. (2004). Preferences for sugars and amino acids and their  
1036 conditionality in a diverse nectar-feeding ant community. *J. Anim. Ecol.* 73, 155–166.  
1037 doi:10.1111/j.1365-2656.2004.00789.x.
- 1038 Blüthgen, N., Gottsberger, G., and Fiedler, K. (2004). Sugar and amino acid composition of  
1039 ant-attended nectar and honeydew sources from an Australian rainforest. *Austral*  
1040 *Ecol.* 29, 418–429. doi:10.1111/j.1442-9993.2004.01380.x.
- 1041 Bogo, G., Bortolotti, L., Sagona, S., Felicioli, A., Galloni, M., Barberis, M., et al. (2019).  
1042 Effects of non-protein amino acids in nectar on bee survival and behavior. *J. Chem.*  
1043 *Ecol.*, 1–8. doi:10.1007/s10886-018-01044-2.
- 1044 Butler, G. D., Webster, J. L., Margolis, H., McGregor, S. E., and Loper, G. M. (1972).  
1045 Amounts and kinds of sugars in nectars of cotton (*Gossypium* spp.) and time of their  
1046 secretion. *Agron. J.* 64, 364–368. doi:10.2134/agronj1972.00021962006400030033x.
- 1047 Camacho, C., Coulouris, G., Avagyan, V., Ma, N., Papadopoulos, J., Bealer, K., et al. (2009).  
1048 BLAST+: architecture and applications. *BMC Bioinformatics* 10, 421.  
1049 doi:10.1186/1471-2105-10-421.
- 1050 Carlson, M. (2016). GO.db: A set of annotation maps describing the entire Gene Ontology.  
1051 Available at: <https://bioconductor.org/packages/GO.db/>
- 1052 Carter, C., Graham, R. A., and Thornburg, R. W. (1999). Nectarin I is a novel, soluble  
1053 germin-like protein expressed in the nectar of *Nicotiana* sp. *Plant Mol. Biol.* 41, 207–  
1054 216. doi:10.1023/A:1006363508648.
- 1055 Carter, C., Healy, R., O’Tool, N. M., Naqvi, S. M. S., Ren, G., Park, S., et al. (2007).  
1056 Tobacco nectaries express a novel NADPH oxidase implicated in the defense of floral  
1057 reproductive tissues against microorganisms. *Plant Physiol.* 143, 389–399.  
1058 doi:10.1104/pp.106.089326.
- 1059 Carter, C., Shafir, S., Yehonatan, L., Palmer, R. G., and Thornburg, R. (2006). A novel role  
1060 for proline in plant floral nectars. *Naturwissenschaften* 93, 72–79.  
1061 doi:10.1007/s00114-005-0062-1.
- 1062 Carter, C., and Thornburg, R. W. (2000). Tobacco nectarin I purification and characterization  
1063 as a germin-like, manganese superoxide dismutase implicated in the defense of floral  
1064 reproductive tissues. *J. Biol. Chem.* 275, 36726–36733.  
1065 doi:10.1074/jbc.M006461200.

- 1066 Carter, C., and Thornburg, R. W. (2004). Is the nectar redox cycle a floral defense against  
1067 microbial attack? *Trends Plant Sci.* 9, 320–324. doi:10.1016/j.tplants.2004.05.008.
- 1068 Chatt, E. C., von Aderkas, P., Carter, C. J., Smith, D., Elliott, M., and Nikolau, B. J. (2018).  
1069 Sex-dependent variation of pumpkin (*Cucurbita maxima* cv. Big Max) nectar and  
1070 nectaries as determined by proteomics and metabolomics. *Front. Plant Sci.* 9, 1–11.  
1071 doi:10.3389/fpls.2018.00860.
- 1072 Dechorgnat, J., Chardon, F., Gaufichon, L., Masclaux-Daubresse, C., Suzuki, A., and Daniel-  
1073 Vedele, F. (2010). Nitrogen uptake, assimilation and remobilization in plants:  
1074 challenges for sustainable and productive agriculture. *Ann. Bot.* 105, 1141–1157.  
1075 doi:10.1093/aob/mcq028.
- 1076 Dussutour, A., and Simpson, S. J. (2009). Communal nutrition in ants. *Curr. Biol.* 19, 740–  
1077 744. doi:10.1016/j.cub.2009.03.015.
- 1078 Eleftheriou, E. P., and Hall, J. L. (1983a). The extrafloral nectaries of cotton: I. Fine structure  
1079 of the secretory papillae. *J. Exp. Bot.* 34, 103–119.
- 1080 Eleftheriou, E. P., and Hall, J. L. (1983b). The extrafloral nectaries of Cotton: II.  
1081 Cytochemical localization of ATPase activity and CA<sup>2+</sup> binding sites, and selective  
1082 osmium impregnation. *J. Exp. Bot.* 34, 1066–1079.
- 1083 Fahn, A. (1979). Ultrastructure of nectaries in relation to nectar secretion. *Am. J. Bot.* 66,  
1084 977–985. doi:10.2307/2442240.
- 1085 Findlay, B. N., Reed, H. M. L., and Mercertll, F. V (1971a). Nectar production in Abutilon  
1086 III. Sugar secretion. *Aust. J. Biol. Sci.* 24, 665–676.
- 1087 Findlay, N., Reed, M. L., and Mercer, F. V (1971b). Nectar production in Abutilon I.  
1088 Movement of nectar through the cuticle. *Aust. J. Biol. Sci.* 24, 647–656.
- 1089 Gilliam, M., McCaughey, W. F., and Moffett, J. O. (1981). Amino acids in the floral nectar  
1090 of cotton. *Apidologie* 12, 125–132.
- 1091 González-Teuber, M., Silva Bueno, J. C., Heil, M., and Boland, W. (2012). Increased host  
1092 investment in extrafloral nectar (EFN) improves the efficiency of a mutualistic  
1093 defensive service. *PLoS One* 7. doi:10.1371/journal.pone.0046598.
- 1094 Hampton, M., Xu, W. W., Kram, B. W., Chambers, E. M., Ehrnriter, J. S., Gralewski, J. H.,  
1095 et al. (2010). Identification of differential gene expression in *Brassica rapa* nectaries  
1096 through expressed sequence tag analysis. *PLoS One* 5.  
1097 doi:10.1371/journal.pone.0008782.
- 1098 Hanny, B. W., and Elmore, C. D. (1974). Amino acid composition of cotton nectar. *J. Agric.*  
1099 *Food Chem.* 22, 476–478.
- 1100 Hansen, R. L., and Lee, Y. J. (2017). Overlapping MALDI-mass spectrometry imaging for  
1101 in-parallel MS and MS/MS data acquisition without sacrificing spatial resolution. *J.*  
1102 *Am. Soc. Mass Spectrom.* 28, 1910–1918. doi:10.1007/s13361-017-1699-7.

- 1103 Haratym, W., and Weryszko-Chmielewska, E. (2017). Ultrastructural and histochemical  
1104 analysis of glandular trichomes of *Marrubium vulgare* L. (Lamiaceae). *Flora*  
1105 *Morphol. Distrib. Funct. Ecol. Plants* 231, 11–20. doi:10.1016/j.flora.2017.04.001.
- 1106 Heberle, H., Meirelles, V. G., da Silva, F. R., Telles, G. P., and Minghim, R. (2015).  
1107 InteractiVenn: A web-based tool for the analysis of sets through Venn diagrams.  
1108 *BMC Bioinformatics* 16, 1–7. doi:10.1186/s12859-015-0611-3.
- 1109 Heil, M. (2011). Nectar: Generation, regulation and ecological functions. *Trends Plant Sci.*  
1110 16, 191–200. doi:10.1016/j.tplants.2011.01.003.
- 1111 Hendriksma, H. P., Oxman, K. L., and Shafir, S. (2014). Amino acid and carbohydrate  
1112 tradeoffs by honey bee nectar foragers and their implications for plant–pollinator  
1113 interactions. *J. Insect Physiol.* 69, 56–64. doi:10.1016/j.jinsphys.2014.05.025.
- 1114 Horner, H. T., Healy, R. A., Cervantes-Martinez, T., and Palmer, R. G. (2003). Floral nectary  
1115 fine structure and development in *Glycine max* L. (Fabaceae). *Int. J. Plant Sci.* 164,  
1116 675–690.
- 1117 Jachula, J., Konarska, A., and Denisow, B. (2018). Micromorphological and histochemical  
1118 attributes of flowers and floral reward in *Linaria vulgaris* (Plantaginaceae).  
1119 *Protoplasma* 255, 1763–1776. doi:10.1007/s00709-018-1269-2.
- 1120 Kowalkowska, A. K., Pawłowicz, M., Guzanek, P., and Krawczyńska, A. T. (2018). Floral  
1121 nectary and osmophore of *Epipactis helleborine* (L.) Crantz (Orchidaceae).  
1122 *Protoplasma* 225, 1811–1825. doi:10.1007/s00709-018-1274-5.
- 1123 Kram, B. W., Bainbridge, E. A., Perera, M. A. D. N., and Carter, C. (2008). Identification,  
1124 cloning and characterization of a GDSL lipase secreted into the nectar of *Jacaranda*  
1125 *mimosifolia*. *Plant Mol. Biol.* 68, 173–183. doi:10.1007/s11103-008-9361-1.
- 1126 Kram, B. W., and Carter, C. J. (2009). *Arabidopsis thaliana* as a model for functional nectary  
1127 analysis. *Sex. Plant Reprod.* 22, 235–246. doi:10.1007/s00497-009-0112-5.
- 1128 Kram, B. W., Xu, W. W., and Carter, C. J. (2009). Uncovering the *Arabidopsis thaliana*  
1129 nectary transcriptome: investigation of differential gene expression in floral  
1130 nectariferous tissues. *BMC Plant Biol.* 9.
- 1131 Kronstedt, E. C., Robards, A. W., Stark, M., and Olesen, P. (1986). Development of  
1132 trichomes in the *Abutilon* nectary gland. *Nord. J. Bot.* 6, 627–639.  
1133 doi:10.1111/j.1756-1051.1986.tb00462.x.
- 1134 Lanza, J. (1988). Ant preferences for passiflora nectar mimics that contain amino acids.  
1135 *Biotropica* 20, 341–344.
- 1136 Lattar, E. C., Galati, B. G., Carrera, C. S., and Ferrucci, M. S. (2018). Floral nectaries of  
1137 *Heliocarpus popayanensis* and *Luehea divaricata* (Malvaceae-Grewioideae): structure  
1138 and ultrastructure. *Aust. J. Bot.* 66, 59–73. doi:https://doi.org/10.1071/BT17086.
- 1139 Lin, I. W., Sosso, D., Chen, L. Q., Gase, K., Kim, S. G., Kessler, D., et al. (2014). Nectar  
1140 secretion requires sucrose phosphate synthases and the sugar transporter SWEET9.  
1141 *Nature* 508, 546–549. doi:10.1038/nature13082.

- 1142 Lin, S.-H., Kuo, H.-F., Canivenc, G., Lin, C.-S., Lepetit, M., Hsu, P.-K., et al. (2008).  
1143 Mutation of the Arabidopsis NRT1.5 nitrate transporter causes defective root-to-shoot  
1144 nitrate transport. *Plant Cell* 20, 2514–2528. doi:10.1105/tpc.108.060244.
- 1145 Liu, G., and Thornburg, R. W. (2012). Knockdown of MYB305 disrupts nectary starch  
1146 metabolism and floral nectar production. *Plant J.* 70, 377–388. doi:10.1111/j.1365-  
1147 313X.2011.04875.x.
- 1148 Loque, D., Ludewig, U., Yuan, L., and von Wiren, N. (2005). Tonoplast intrinsic proteins  
1149 AtTIP2;1 and AtTIP2;3 facilitate NH<sub>3</sub> transport into the vacuole. *Plant Physiol.* 137,  
1150 671–680. doi:10.1104/pp.104.051268.
- 1151 Main, C. L. (2012). Cotton growth and development patterns. Knoxville, TN Available at:  
1152 <https://extension.tennessee.edu/publications/Documents/W287.pdf>.
- 1153 Meyer, C., and Stitt, M. (2001). “Nitrate reduction and signalling,” in *Plant Nitrogen*, eds. P.  
1154 Lea and J. Morot-Gaudry (Berlin, Heidelberg: Springer), 37–59.
- 1155 Mitchell, R. J., Irwin, R. E., Flanagan, R. J., and Karron, J. D. (2009). Ecology and evolution  
1156 of plant–pollinator interactions. *Ann. Bot.* 103, 1355–1363. doi:10.1093/aob/mcp122.
- 1157 Mueller, L. A., Zhang, P., and Rhee, S. Y. (2003). AraCyc: A biochemical pathway database  
1158 for Arabidopsis. *Plant Physiol.* 132, 453–460. doi:10.1104/pp.102.017236.
- 1159 Nepi, M. (2014). Beyond nectar sweetness: the hidden ecological role of non-protein amino  
1160 acids in nectar. *J. Ecol.* 102, 108–115. doi:10.1111/1365-2745.12170.
- 1161 Ollerton, J. (2017). Pollinator diversity: Distribution, ecological function, and conservation.  
1162 *Annu. Rev. Ecol. Evol. Syst.* 48, 353–376. doi:10.1146/annurev-ecolsys-110316-  
1163 022919.
- 1164 Paiva, E. A. S. (2016). How do secretory products cross the plant cell wall to be released? A  
1165 new hypothesis involving cyclic mechanical actions of the protoplast. *Ann. Bot.* 117,  
1166 533–40. doi:10.1093/aob/mcw012.
- 1167 Paiva, E. A. S. (2017). How does the nectar of stomata-free nectaries cross the cuticle? *Acta*  
1168 *Bot. Brasilica* 31, 525–530. doi:10.1590/0102-33062016abb0444.
- 1169 Peng, Y. Ben, Li, Y. Q., Hao, Y. J., Xu, Z. H., and Bai, S. N. (2004). Nectar production and  
1170 transportation in the nectaries of the female *Cucumis sativus* L. flower during  
1171 anthesis. *Protoplasma* 224, 71–78. doi:10.1007/s00709-004-0051-9.
- 1172 Petanidou, T., Van Laere, A., Ellis, W. N., and Smets, E. (2006). What shapes amino acid  
1173 and sugar composition in Mediterranean floral nectars? *Oikos* 115, 155–169.
- 1174 Plachno, B. J., Stpiczynska, M., Adamec, L., Miranda, V. F. O., and Świątek, P. (2018).  
1175 Nectar trichome structure of aquatic bladderworts from the section *Utricularia*  
1176 (*Lentibulariaceae*) with observation of flower visitors and pollinators. *Protoplasma*  
1177 255, 1053–1064. doi:10.1007/s00709-018-1216-2.
- 1178 Pleasants, J. M. (1983). Nectar production patterns in *Ipomopsis aggregata* (*Polemoniaceae*).  
1179 *Am. J. Bot.* 70, 1468–1475. doi:10.2307/2443345.



- 1180 Prasifka, J. R., Mallinger, R. E., Portlas, Z. M., Hulke, B. S., Fugate, K. K., Paradis, T., et al.  
1181 (2018). Using nectar-related traits to enhance crop-pollinator interactions. *Front. Plant*  
1182 *Sci.* 9, 1–8. doi:10.3389/fpls.2018.00812.
- 1183 Ren, G., Healy, R. A., Klyne, A. M., Horner, H. T., James, M. G., and Thornburg, R. W.  
1184 (2007). Transient starch metabolism in ornamental tobacco floral nectaries regulates  
1185 nectar composition and release. *Plant Sci.* 173, 277–290.  
1186 doi:10.1016/j.plantsci.2007.05.008.
- 1187 Rhodes, J. (2002). Cotton pollination by honey bees. *Aust. J. Exp. Agric.* 42, 513–518.  
1188 doi:10.1071/EA97144.
- 1189 Roy, R., Schmitt, A. J., Thomas, J. B., and Carter, C. J. (2017). Review: Nectar biology:  
1190 from molecules to ecosystems. *Plant Sci.* 262, 148–164.  
1191 doi:10.1016/j.plantsci.2017.04.012.
- 1192 Rudgers, J. A., Hodgen, J. G., and White, J. W. (2003). Behavioral mechanisms underlie an  
1193 ant-plant mutualism. *Oecologia* 135, 51–59. doi:10.1007/s00442-002-1168-1.
- 1194 Rudgers, J. A., and Strauss, S. Y. (2004). A selection mosaic in the facultative mutualism  
1195 between ants and wild cotton. *Proc. R. Soc. B Biol. Sci.* 271, 2481–2488.  
1196 doi:10.1098/rspb.2004.2900.
- 1197 Ruhlmann, J. M., Kram, B. W., and Carter, C. J. (2010). CELL WALL INVERTASE 4 is  
1198 required for nectar production in *Arabidopsis*. *J. Exp. Bot.* 61, 395–404.  
1199 doi:10.1093/jxb/erp309.
- 1200 Ruzin, S. E. (1999). *Plant microtechnique and microscopy*. 198th ed. New York: Oxford  
1201 University Press.
- 1202 Sawidis, T. H., Eleftheriou, E. P., and Tsekos, I. (1987). The floral nectaries of *Hibiscus*  
1203 *rosa-sinensis*: 1. development of the secretory hairs. *Ann. Bot.* 59, 643–652.  
1204 Available at: <https://doi.org/10.1093/oxfordjournals.aob.a087361>.
- 1205 Shiraishi, A., and Kuwabara, M. (1970). The effects of amino acids on the labellar hair  
1206 chemosensory cells of the fly. *J. Gen. Physiol.* 56, 768–782.  
1207 doi:10.1085/jgp.56.6.768.
- 1208 Simpson, B. B., and Neff, J. L. (1981). Floral rewards: Alternatives to pollen and nectar.  
1209 *Ann. Missouri Bot. Gard.* 68, 301–322. doi:10.2307/2398800.
- 1210 Solhaug, E. ., Roy, R., Chatt, E. C., Klinkenberg, P. M., Hampton, M. E., Nikolau, B. J., et  
1211 al. Analysis of the *Cucurbita pepo* nectary transcriptome reveals key modules of  
1212 primary metabolism involved in nectar synthesis.
- 1213 Solhaug, E. M., Roy, R., Chatt, E. C., Klinkenberg, M. P., Mohd-Fadzil, N.-A., Hampton,  
1214 M., et al. (2019). An integrated transcriptomics and metabolomics analysis of the  
1215 *Cucurbita pepo* nectary implicates key modules of primary metabolism involved in  
1216 nectar synthesis and secretion. *Plant Direct*, 1–13. doi:10.1002/pld3.120.

- 1217 Stein, S. E. (1999). An integrated method for spectrum extraction and compound  
1218 identification from gas chromatography/mass spectrometry data. *J. Am. Soc. Mass*  
1219 *Spectrom.* 10, 770–781.
- 1220 Stone, T. B., Thompson, A. C., and Pitre, H. N. (1985). Analysis of lipids in cotton  
1221 extrafloral nectar. *J. Entomol. Sci.* 20, 422–428.
- 1222 Stpiczyńska, M., Milanese, C., Faleri, C., and Cresti, M. (2005). Ultrastructure of the nectary  
1223 spur of *Platanthera chlorantha* (Custer) Rchb. (Orchidaceae) during successive stages  
1224 of nectar secretion. *Acta Biol Cracov* 47, 111–119.
- 1225 Thimm, O., Bläsing, O., Gibon, Y., Nagel, A., Meyer, S., Krüger, P., et al. (2004).  
1226 MAPMAN: A user-driven tool to display genomics data sets onto diagrams of  
1227 metabolic pathways and other biological processes. *Plant J.* 37, 914–939.  
1228 doi:10.1111/j.1365-313X.2004.02016.x.
- 1229 Thomas, J. B., Hampton, M. E., Dorn, K. M., David Marks, M., and Carter, C. J. (2017). The  
1230 pennycress (*Thlaspi arvense* L.) nectary: Structural and transcriptomic  
1231 characterization. *BMC Plant Biol.* 17, 1–9. doi:10.1186/s12870-017-1146-8.
- 1232 Thornburg, R. W., Carter, C., Powell, A., Mittler, R., Rizhsky, L., and Horner, H. T. (2003).  
1233 A major function of the tobacco floral nectary is defense against microbial attack.  
1234 *Plant Syst. Evol.* 238, 211–218. doi:10.1007/s00606-003-0282-9.
- 1235 Tilney, P. M., Nel, M., and van Wyk, A. E. (2018). Foliar secretory structures in *Ekebergia*  
1236 *capensis* (Meliaceae). *Heliyon* 4, e00541. doi:10.1016/j.heliyon.2018.e00541.
- 1237 Tölke, E. D., Bachelier, J. B., Lima, E. A., Galetto, L., Demarco, D., and Carmello-  
1238 Guerreiro, S. M. (2018). Diversity of floral nectary secretions and structure, and  
1239 implications for their evolution in Anacardiaceae. *Bot. J. Linn. Soc.* 187, 209–231.  
1240 doi:10.1093/botlinnean/boy016.
- 1241 Tsay, Y. F., Chiu, C. C., Tsai, C. B., Ho, C. H., and Hsu, P. K. (2007). Nitrate transporters  
1242 and peptide transporters. *FEBS Lett.* 581, 2290–2300.  
1243 doi:10.1016/j.febslet.2007.04.047.
- 1244 Vassilyev, A. E. (2010). On the mechanisms of nectar secretion: revisited. *Ann. Bot.* 105,  
1245 349–354. doi:10.1093/aob/mcp302.
- 1246 Wäckers, F. L., and Bonifay, C. (2004). How to be sweet? Extrafloral nectar allocation by  
1247 *Gossypium hirsutum* fits optimal defense theory predictions. *Ecology* 85, 1512–1518.  
1248 doi:10.1890/03-0422.
- 1249 Wäckers, F., Zuber, D., Wunderlin, R., and Keller, F. (2001). The effect of herbivory on  
1250 temporal and spatial dynamics of foliar nectar production in cotton and castor. *Ann.*  
1251 *Bot.* 87, 365–370. doi:10.1006/anbo.2000.1342.
- 1252 Waller, G. D. (1972). Evaluating responses of honey bees to sugar solutions using an  
1253 artificial-flower feeder. *Ann. Entomol. Soc. Am.* 65, 857–862.  
1254 doi:10.1093/aesa/65.4.857.

- 1255 Wergin, W. P., Elmore, C. D., Hanny, B. W., and Ingber, B. F. (1975). Ultrastructure of the  
1256 subglandular cells from the foliar nectaries of cotton in relation to the distribution of  
1257 plasmodesmata and the symplastic transport of nectar. *Am. J. Bot.* 62, 842–849.
- 1258 Wiesen, L. B., Bender, R. L., Paradis, T., Larson, A., Perera, M. A. D. N., Nikolau, B. J., et  
1259 al. (2016). A Role for GIBBERELLIN 2-OXIDASE6 and gibberellins in regulating  
1260 nectar production. *Mol. Plant* 9, 753–756. doi:10.1016/j.molp.2015.12.019.
- 1261 Yamada, N., Sakakibara, S., Tsutsumi, K., Waditee, R., Tanaka, Y., and Takabe, T. (2011).  
1262 Expression and substrate specificity of betaine/proline transporters suggest a novel  
1263 choline transport mechanism in sugar beet. *J. Plant Physiol.* 168, 1609–1616.  
1264 doi:10.1016/j.jplph.2011.03.007.
- 1265

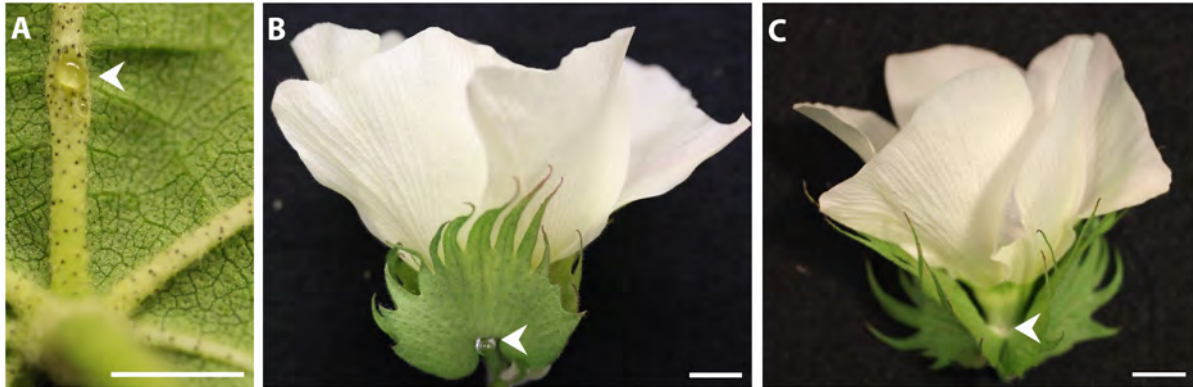

FIGURE 1 | Extrafloral nectaries present on *G. hirsutum* leaves and flowers indicated by arrow heads: the foliar nectary (A), bracteal nectary (B), and circumbracteal nectary (C). Scale bar A = 5 mm; B, C = 10 mm.

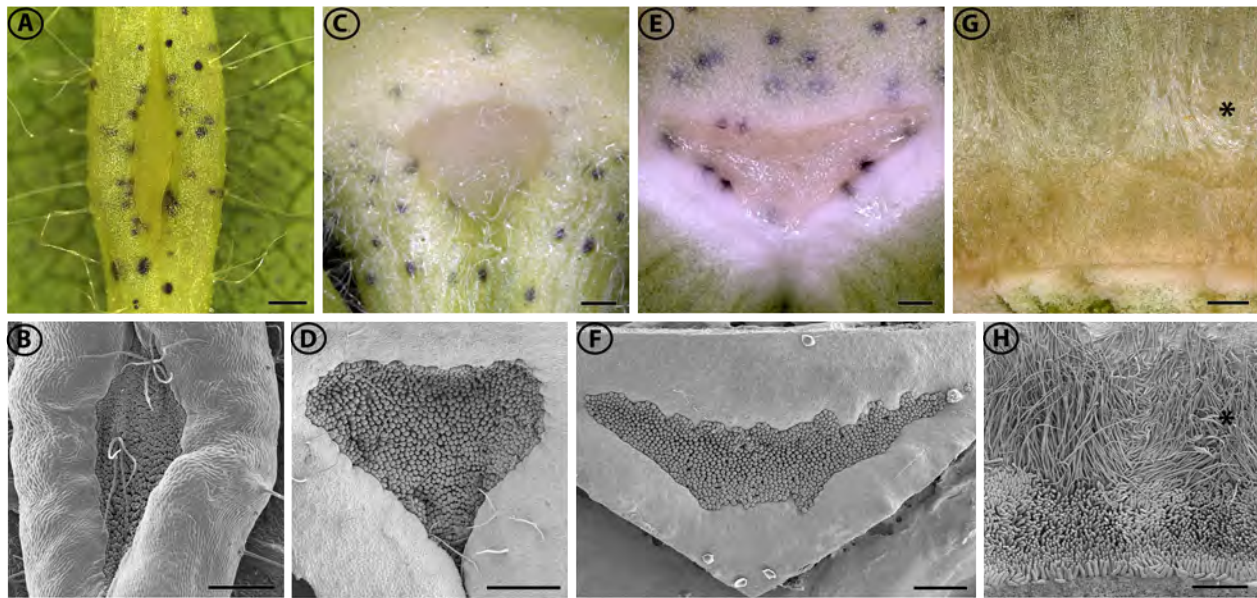

FIGURE 2 | Macrostructure of *G. hirsutum* nectaries at the secretory stage of development, viewed with a macrozoom microscope (A, C, E, G) and SEM (B, D, F, H). Extrafloral nectaries (A-F) are composed of a pit of densely packed papillae. Floral nectary (G, H) is composed of a ring of stellate trichomes (\*) subtended by a ring of papillae. (A, B) Foliar nectary; (C, D) Bracteal nectary; (E, F) Circumbracteal nectary; (G, H) Floral nectary. Scale bars = 0.5 mm

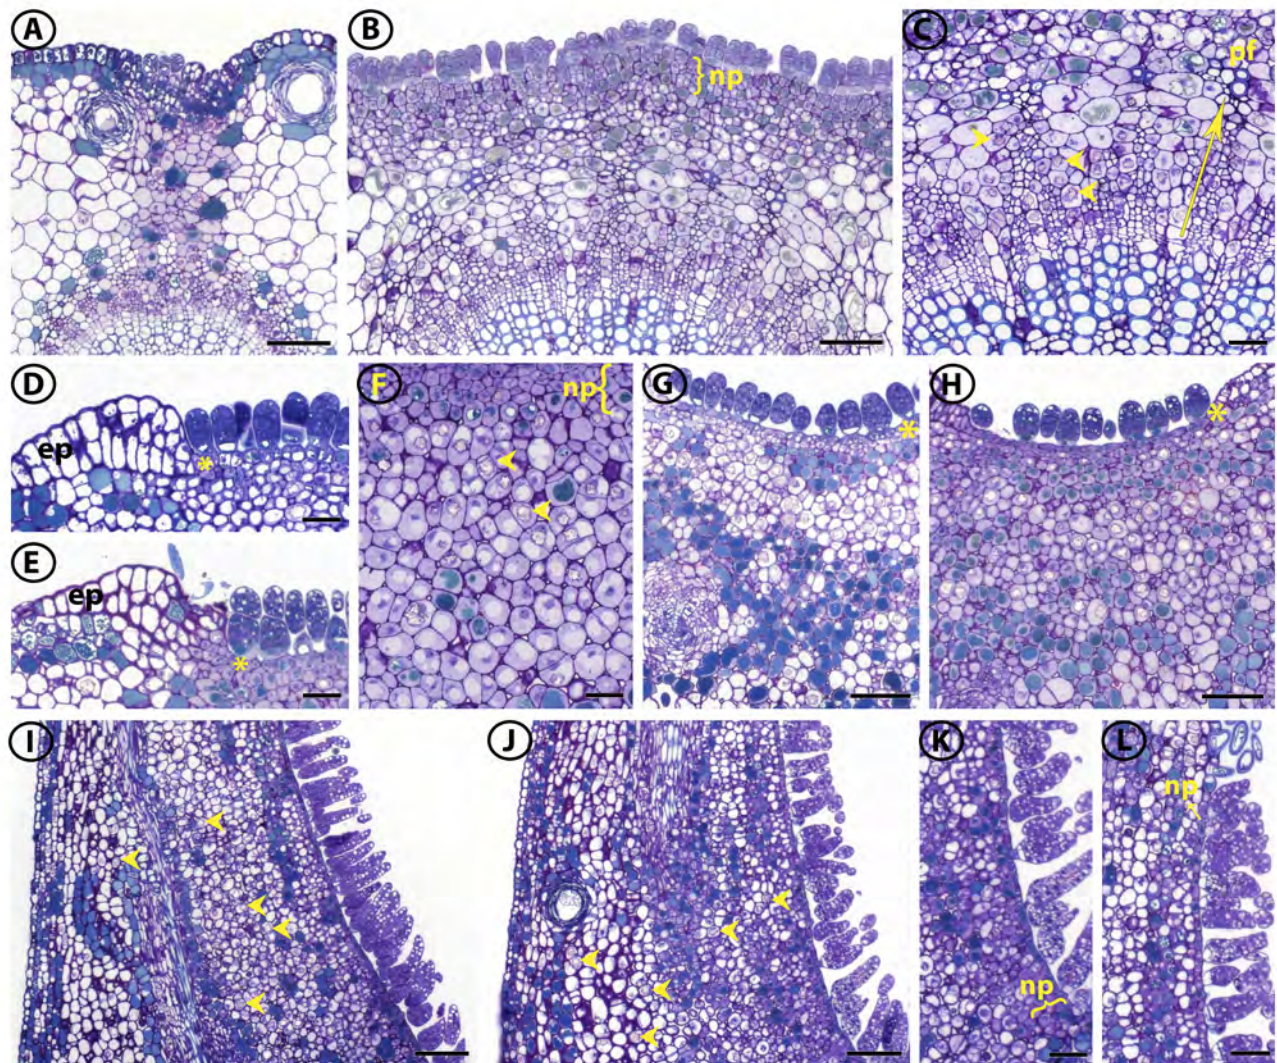

FIGURE 3 | Light micrographs of *G. hirsutum* nectary longitudinal sections stained with Toluidine Blue O. (A) Foliar pre-secretory nectary; (B) Foliar secretory nectary; (C) Foliar secretory nectary, phloem rays extending into the subnectariferous parenchyma highlighted by arrow, arrow heads point to druse crystals; (D) Bracteal pre-secretory nectary; (E) Bracteal secretory nectary; (F) Bracteal secretory nectary nectariferous and subnectariferous parenchyma subtending the papillae, arrow heads point to druse crystals; (G) Circumbracteal pre-secretory nectary; (H) Circumbracteal secretory nectary; (I) Floral pre-secretory nectary, arrow heads point to druse crystals; (J) Floral secretory nectary, arrow heads point to druse crystals; (K) Proximal portion of floral secretory nectary; (L) Distal portion of floral secretory nectary. Abbreviations: ep = epidermis; np = nectariferous parenchyma; pf = phloem fiber; \* = hypoepidermis. Scale bars A, B, G, H, I, J = 100  $\mu$ m; C, D, E, F, K, L = 50  $\mu$ m.

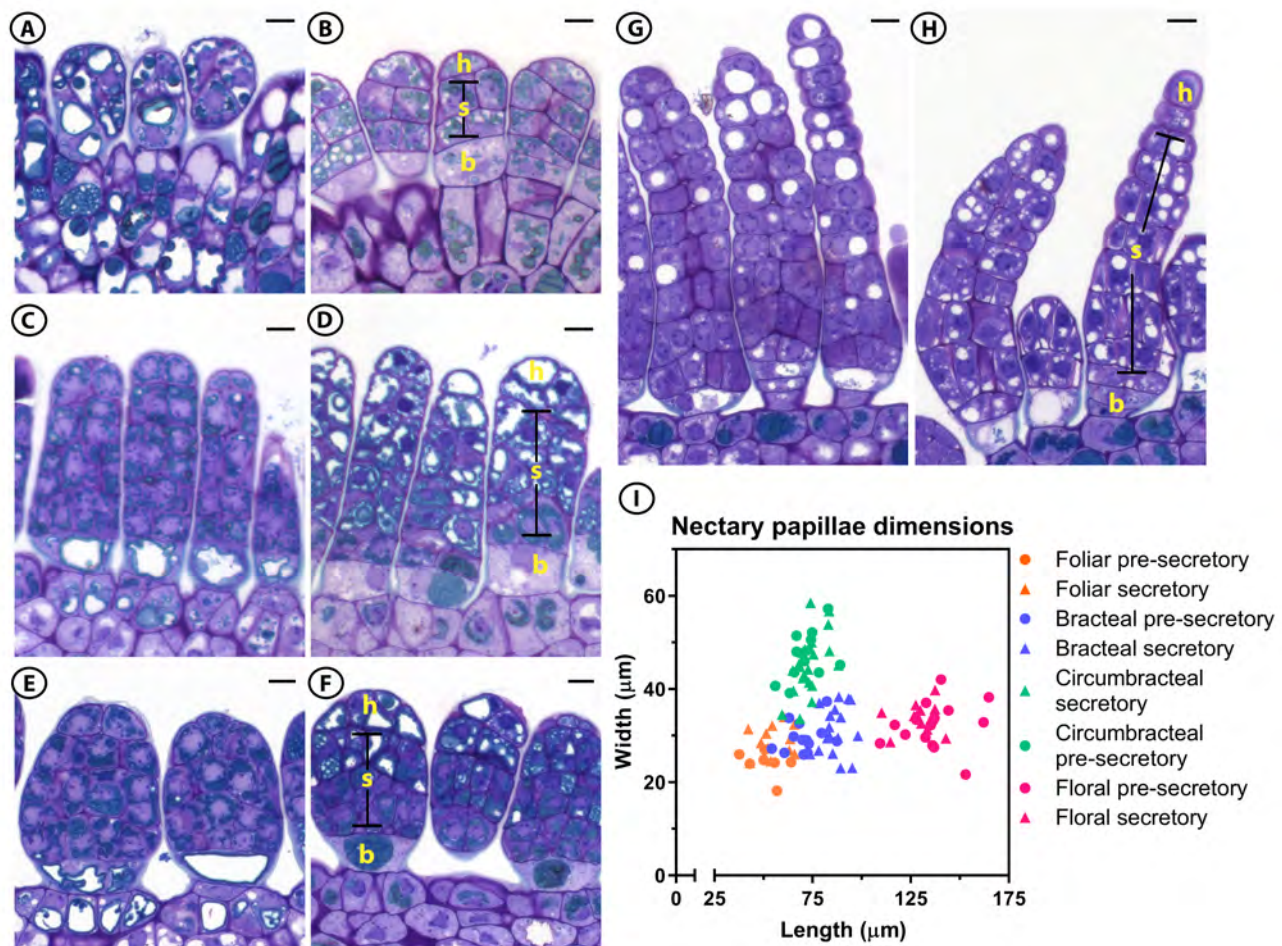

FIGURE 4 | Light micrographs of *G. hirsutum* papillae longitudinal sections from the four different nectary types stained with Toluidine Blue O and their dimensions. (A) Foliar pre-secretory; (B) Foliar secretory; (C) Bracteal pre-secretory; (D) Bracteal secretory; (E) Circumbracteal pre-secretory; (F) Circumbracteal secretory; (G) Floral pre-secretory; (H) Floral secretory; (I) Length and width distribution of the nectary papillae at different stages of development. A total of 7 to 22 papillae were measured for each nectary type and at each developmental stage. Abbreviations: h = head cells; s = stalk cells; b = basal cells. All scale bars = 10  $\mu\text{m}$

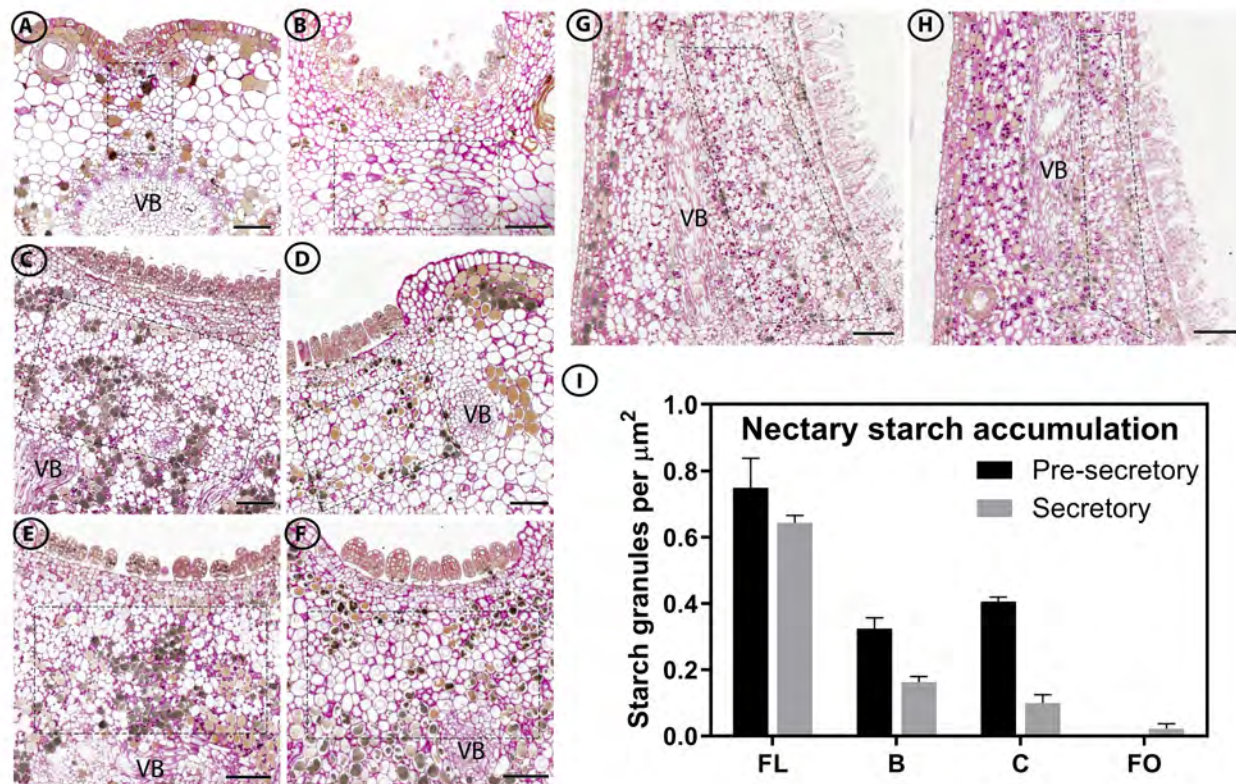

FIGURE 5 | Distribution of starch granules within subnectariferous parenchyma (regions within dashed boxes) during development of *G. hirsutum* nectaries visualized by PAS staining and light microscopy and their density. (A) Foliar pre-secretory; (B) Foliar secretory; (C) Bracteal pre-secretory; (D) Bracteal secretory; (E) Circumbracteal pre-secretory; (F) Circumbracteal secretory (G) Floral pre-secretory; (H) Floral secretory; (I) Density of starch granules within the subnectariferous parenchyma of *G. hirsutum* nectaries during nectary development. For each nectary type and developmental stage, starch granules were counted from a minimum of six sections originating from two separate nectaries. Error bars represent S.E. Abbreviations: VB = vascular bundle; FL = floral; B = bracteal; C = circumbracteal; FO = foliar. Scale bars = 100  $\mu\text{m}$ .



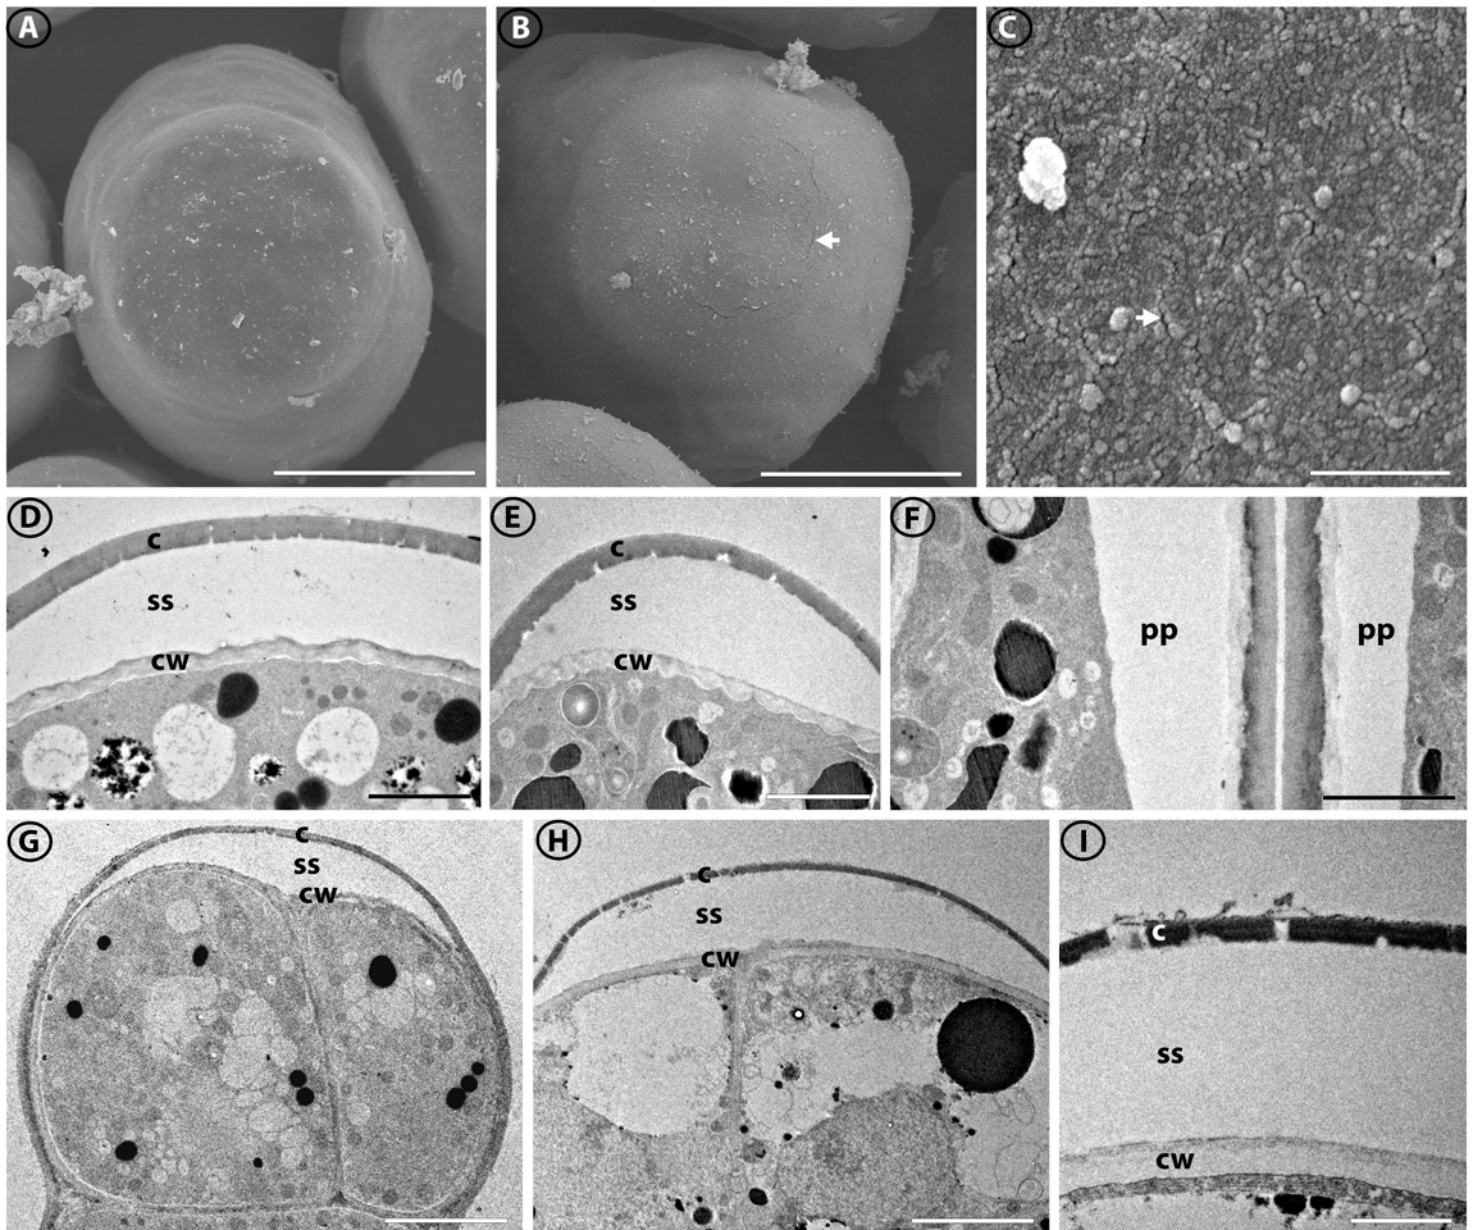

FIGURE 6 | SEM (A-C) and TEM (D-I) images of the cuticle and cell wall of *G. hirsutum* nectary papillae. (A) Terminal end of papillae of circumbracteal nectary at pre-secretory stage, note lack of microchannels (cracks) in cuticle surface; (B) Circumbracteal nectary at secretory stage, arrow head identifies the microchannels in the cuticle surface; (C) Surface of a terminal cell from a foliar nectary papilla at secretory stage, arrowhead identifies the cuticular microchannels; (D) Head cell from secretory circumbracteal papilla; (E) Secretory bracteal papilla showing separated cuticle (c) with microchannels and cell wall ingrowths; (F) Two adjacent distal stalk cells from secretory bracteal papillae, note periplasmic space (pp); (G) Head cells from secretory floral papilla; (H) Secretory foliar papilla showing separated cuticle; (I) Porous cuticle of head cell of bracteal secretory papilla. Abbreviations: c = cuticle; cw = cell wall; ss = subcuticular space; pp = periplasmic space. Scale bars A, B = 25 μm; C = 50 nm; D, E, F = 2 μm; G, H = 5 μm; I = 1 μm

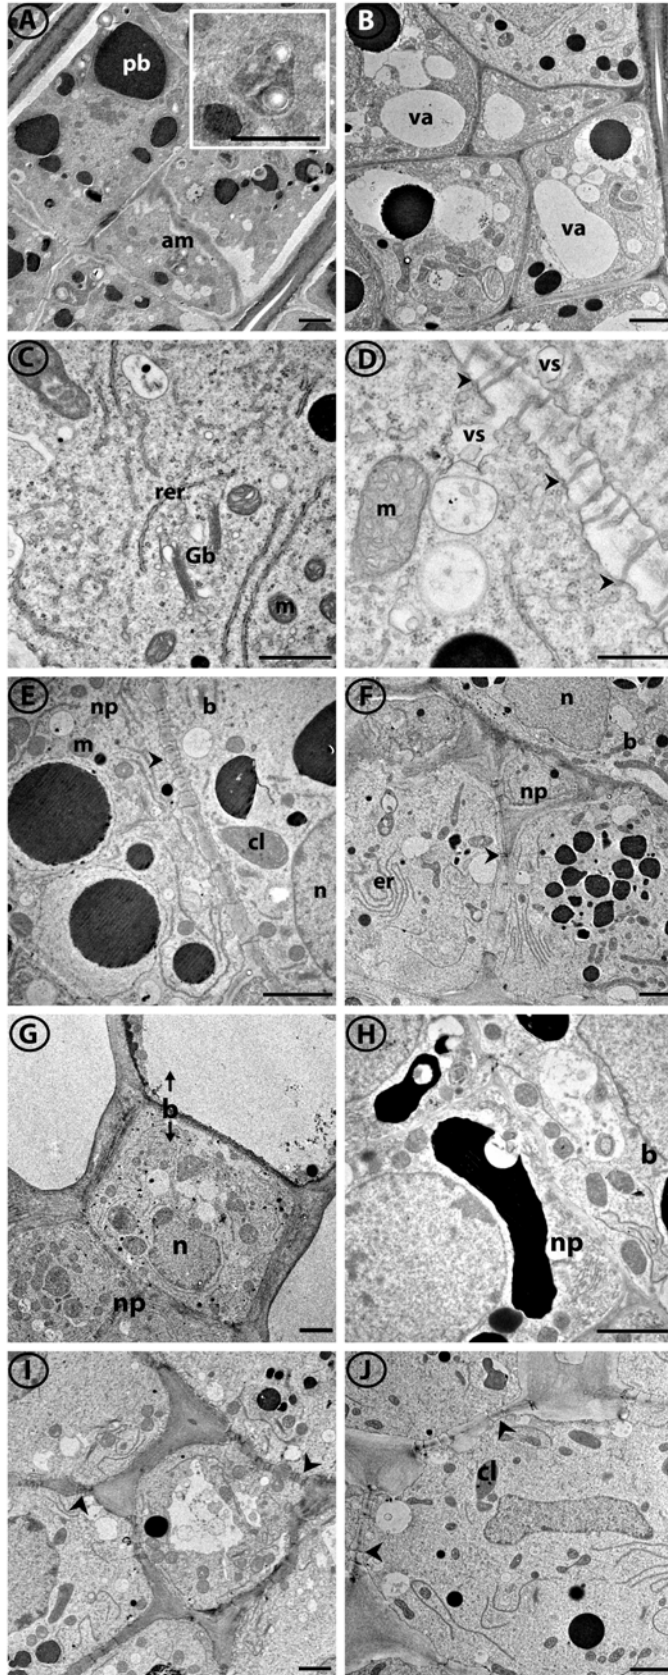

**FIGURE 7 | TEM of the cellular details of *G. hirsutum* nectary papillae and supporting nectariferous parenchyma tissue at the secretory stage. (A) Stalk cells from bracteal nectary with amyloplast insert; (B) Stalk cell from foliar nectary; (C) Organelles of stalk cell exemplified by foliar nectary; (D) Plasmodesmata (arrowheads) in cell wall of internal stalk cell; (E-G) Junction between basal cell and nectariferous parenchyma of (E) bracteal nectary; (F) foliar nectary; (G) floral nectary; (H) Basal cell from circumbracteal nectary; (I) Nectariferous parenchyma from bracteal nectary; (J) Nectariferous parenchyma from foliar nectary. Arrowheads identify plasmodesmata. Abbreviations: am = amyloplasts; cl = chloroplast; b = basal cell; er = endoplasmic reticulum; Gb = Golgi body; m = mitochondria; n = nucleus; np = nectariferous parenchyma; pb = phenolic body; rer = rough endoplasmic reticulum; va = vacuole; vs = vesicle. Scale bars A, B, E - J = 2  $\mu$ m; C = 1  $\mu$ m; D = 0.5  $\mu$ m.**

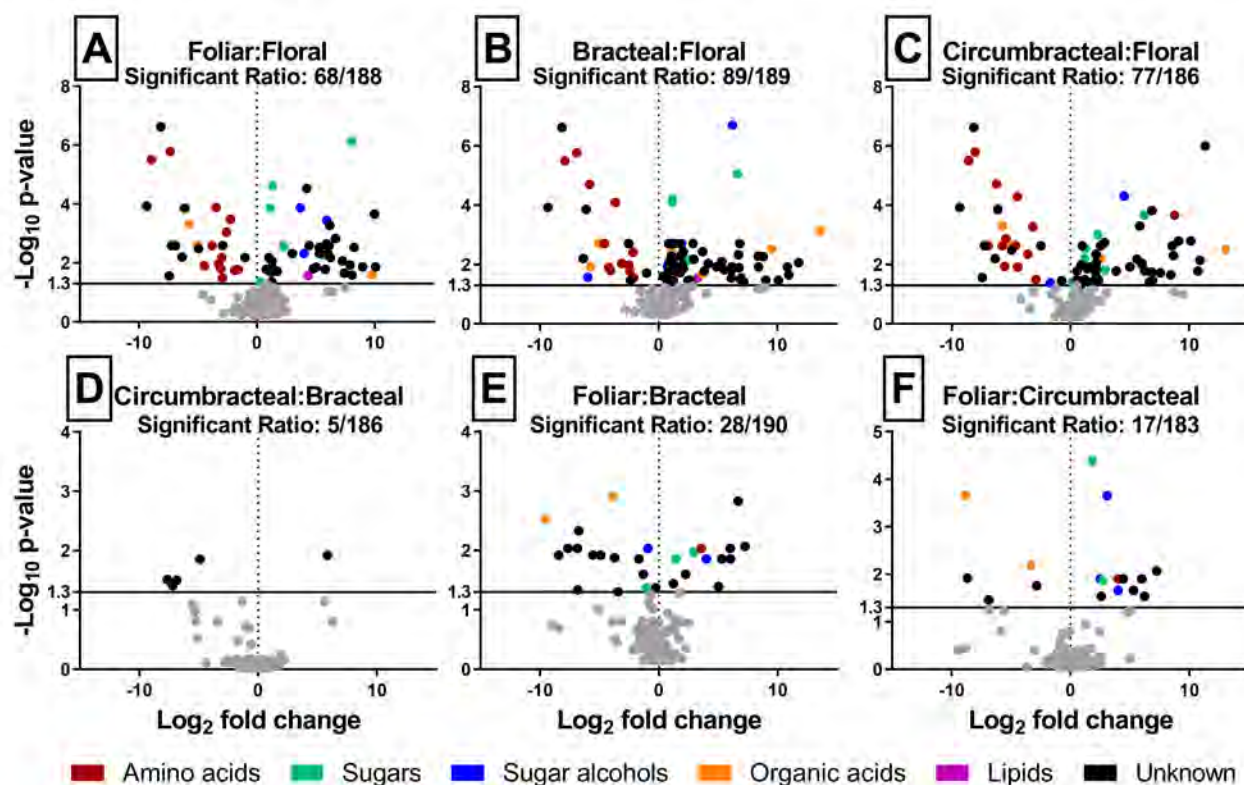

FIGURE 8 | Volcano plot analyses of all possible pairwise comparisons of *G. hirsutum* nectar metabolomes. In each comparison, “significant ratio” identifies the proportion of the detected analytes whose abundance difference is statistically significant (colored data points above the y-axis value of 1.3) between the two nectar types. The chemical class identity of the metabolites is color-coded.

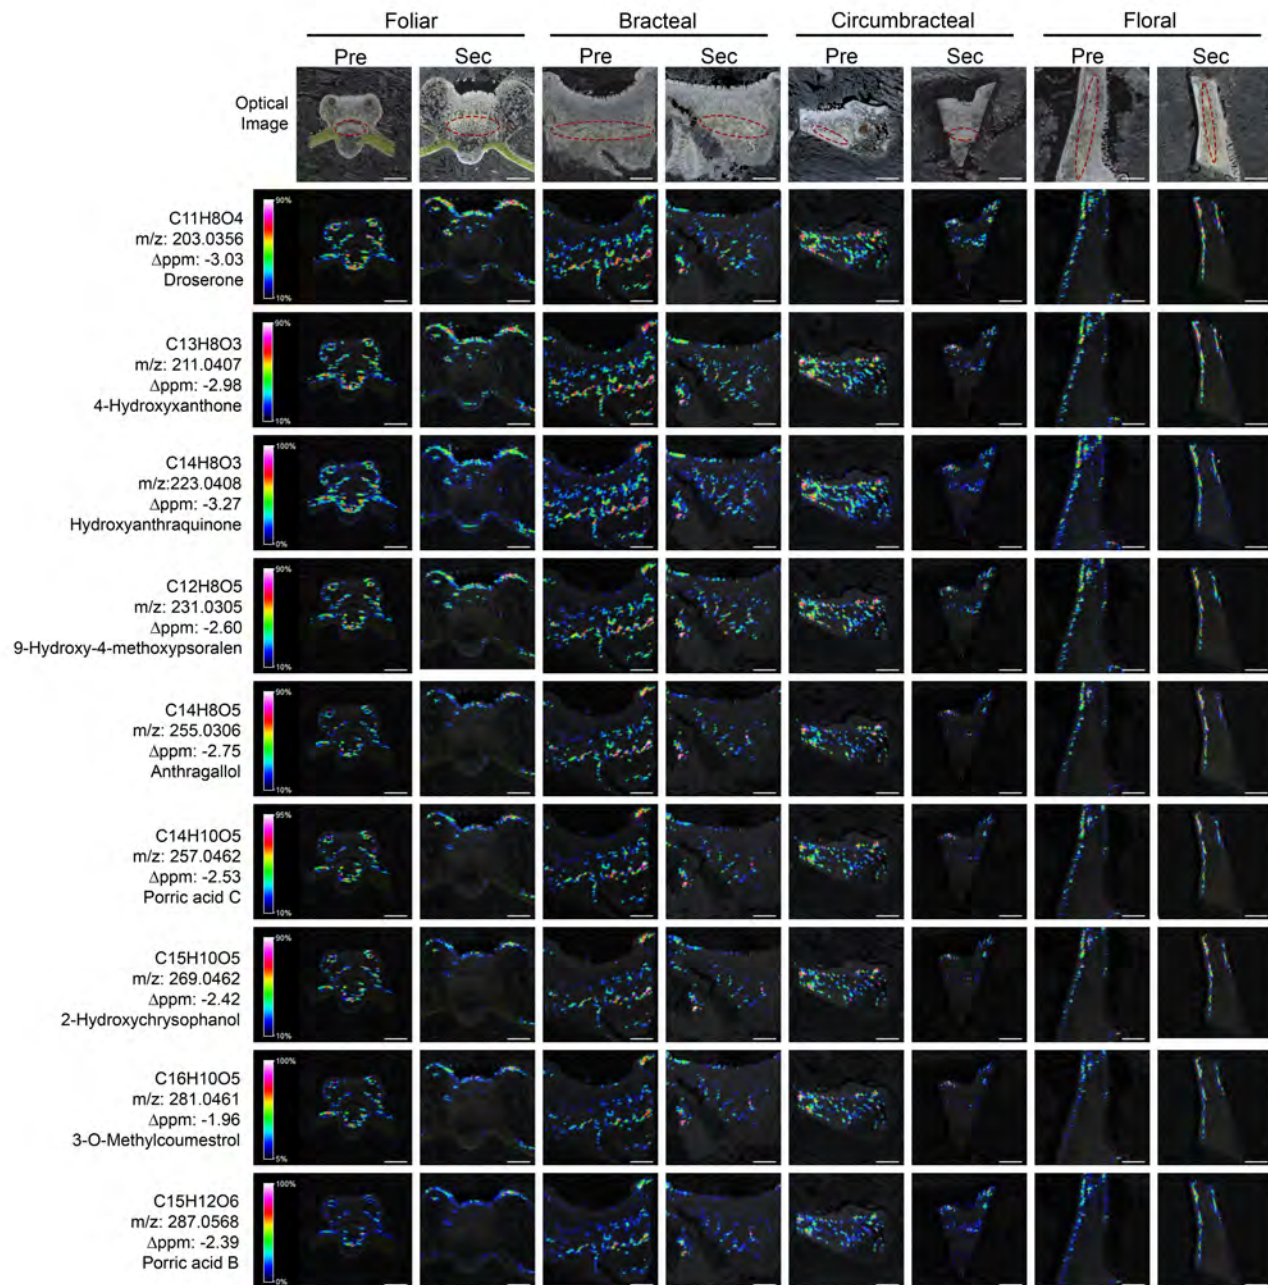

FIGURE 9 | Spatial distribution of phenolic metabolites visualized by mass-spectrometric imaging. Each MS image was obtained from the longitudinal cryosections of *G. hirsutum* nectaries that were optically imaged in parallel (top row). The position of the vasculature is highlighted by red colored ovals in the optical images. The MS imaging data was collected with a laser spot size, enabling a 25- $\mu\text{m}$  spatial resolution of the metabolites. The ion signals are scaled to the maximum signal of the highest spectrum. The scaled ion signals are displayed by the rainbow heat map coloration. Scale bars = 500  $\mu\text{m}$ .

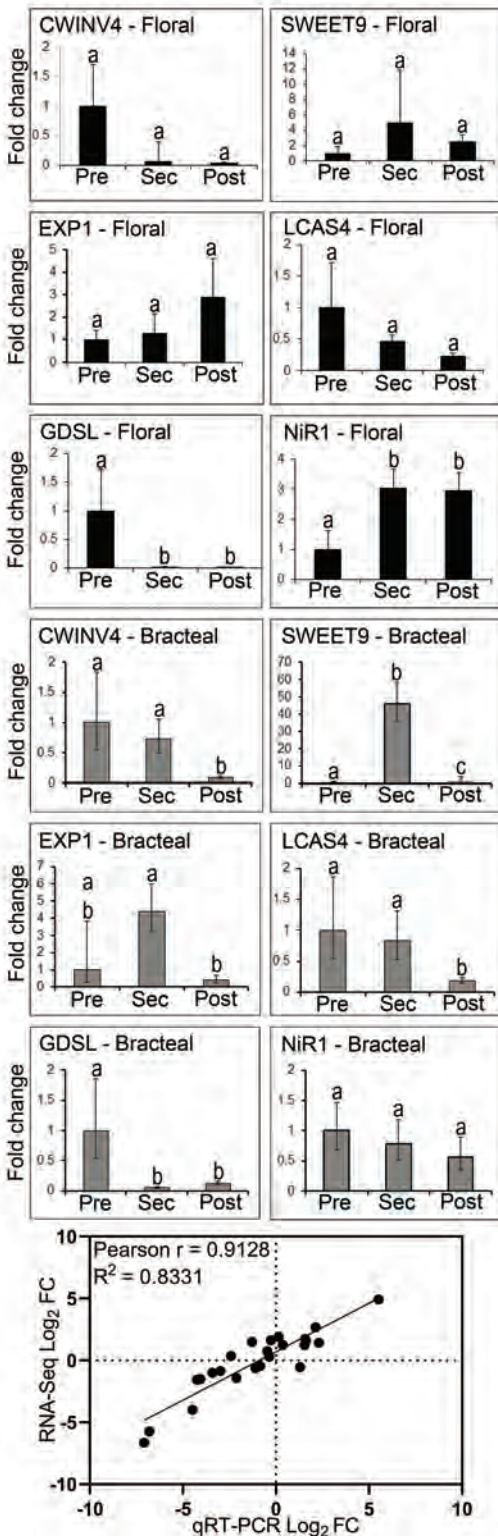

FIGURE 10 | Validation of RNA-seq data by parallel qRT-PCR analysis. Using the identical RNA samples subjected to RNA-seq analysis, the expression of 6 targeted genes was analyzed by qRT-PCR. These genes are: *CWINV4* (Cell Wall Invertase 4), *EXP1* (Expansin1); *NiR1* (Nitrite reductase 1); *LCAS4* (long chain acyl-CoA synthetase 4-like); *GDSL* (GDSL-like Lipase/acylhydrolase); and *SWEET9* (Sugars Will Eventually be Exported Transporter 9). Expression was evaluated during the development of floral and bracteal nectaries as they transition from pre-secretory (Pre) to secretory (Sec) and to post-secretory (Post) stages, and the data are expressed as fold-change relative to the pre-secretory stage. Error bars represent SE from a total of 3 biological replicates. The scatter plot displays the Pearson's correlation analysis between the RNA-seq and qRT-PCR datasets, expressed as fold-change in expression relative to the pre-secretory stage (on a log base-2 scale).

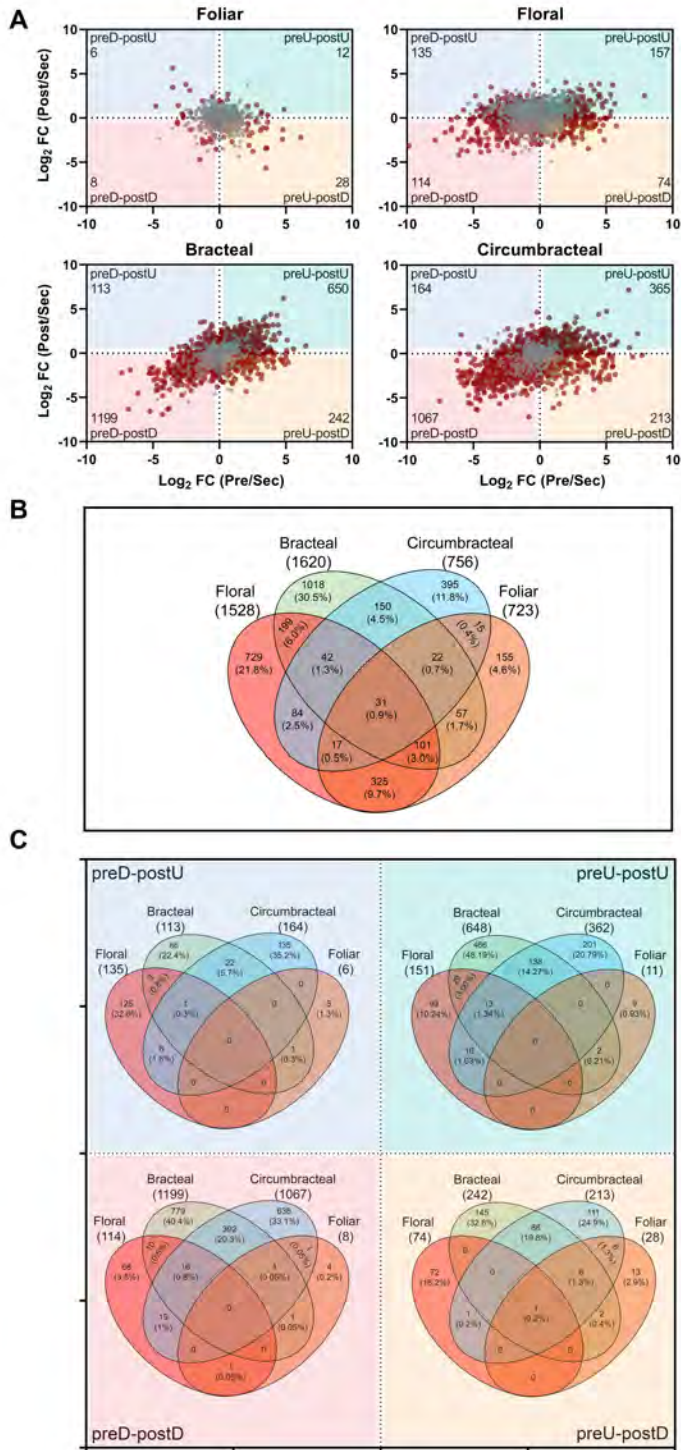

**FIGURE 11 | Differentially expressed genes in four nectary types. (A)** Scatter plots displaying differentially expressed genes in relation to the development of each nectary from presecretory (Pre) to secretory (Sec) to post-secretory (Post) stages, normalized to the expression level at the secretory stage. Grey colored data points represent genes that are preferentially expressed in each nectary type with respect to the adjoining non-nectary tissue, but expression is minimally affected by nectary development. Red colored data points represent genes that are differentially expressed in each nectary type, and expression is also modulated by the development of each nectary type. These red data points are divided into four quadrants, which detail changes in gene expression patterns normalized to the secretory developmental stage: 1) down-regulated at the pre-secretory stage and up-regulated at the post-secretory stage (preD-postU); 2) up-regulated at the pre-secretory stage and up-regulated at the post-secretory stage (preU-postU); 3) up-regulated at the pre-secretory stage and down-regulated at the post-secretory stage (preD-postD); and 4) down-regulated at the pre-secretory stage and down-regulated at the post-secretory stage (preU-postD). The number of differentially expressed genes in each sector is identified in the outer corner of each sector. **(B)** Venn diagram representation of the distribution of genes displaying nectary tissue preferential expression, but not modulated by the developmental stage of each nectary (i.e., the genes identified by grey data-points in panel A). The digits identify the absolute number and percentage of genes falling into each subset category. **(C)** Venn diagram representation of the distribution of genes that show nectary-tissue specific expression and temporal patterns of gene expression as they transition through presecretory, secretory and post-secretory stages of development (i.e., overlap among the genes represented by red-colored data-points in panel A.) The digits identify the absolute number and percentage of genes falling into each subset category.

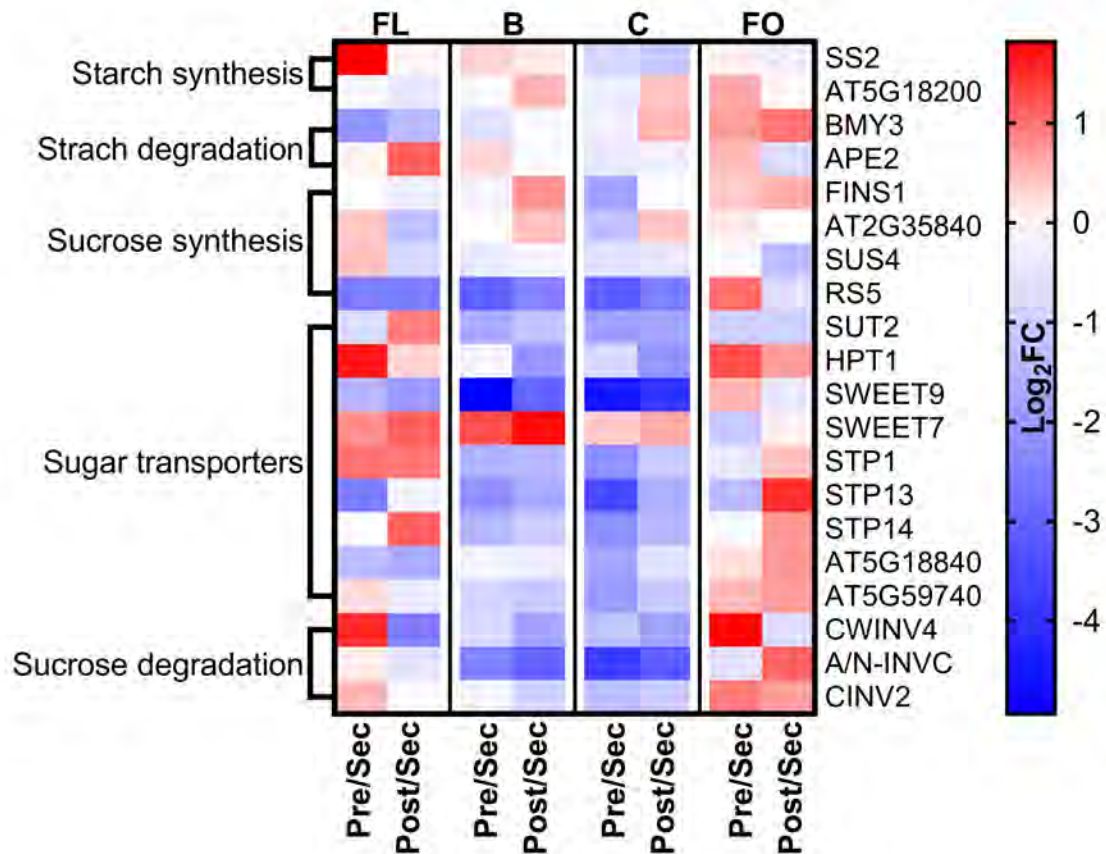

FIGURE 12 | Expression analysis of genes involved in starch and sucrose metabolism. Normalized RNA-seq data was used to generate heat maps of changes in gene expression as each nectary-type transition from pre-secretory to secretory and from secretory to post-secretory stages of development. The blue-red color scale indicates the relative fold-change (FC) between these developmental transitions, on a logarithmic (base-2) scale. Full names for the abbreviations of individual genes are provided in Supplemental File 10. Abbreviations: FL = floral; B = bracteal; C = circumbracteal; FO = foliar; Pre = pre-secretory; Sec = secretory; Post = post-secretory

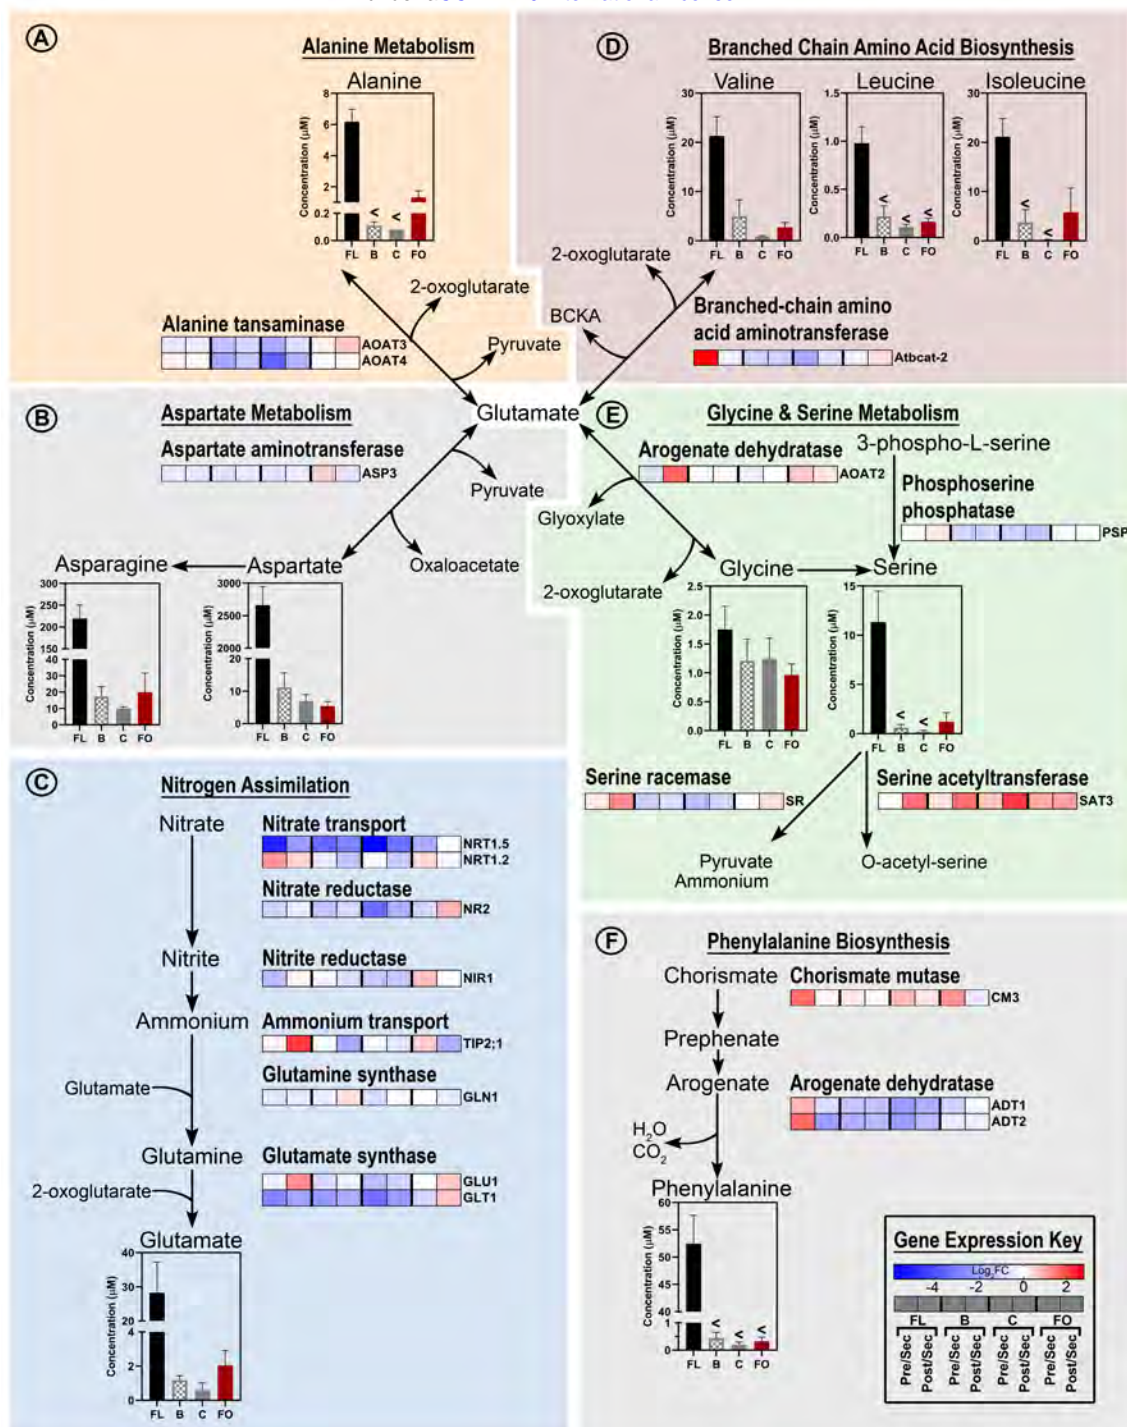

FIGURE 13 | Integration of metabolomics and transcriptomics data to decipher the metabolic processes that support nitrogen assimilation and amino acid biosynthesis in nectaries. Each metabolic module (A-F) integrates metabolomics data of metabolic intermediates and gene expression data of enzymes catalyzing key metabolic processes. The “gene expression key” indicates the logarithmic (base-2) fold-change ( $\text{Log}_2\text{FC}$ ) between the four nectary types as modulated by developmental transitions. Gene descriptions are provided in Supplemental File 10. Data-bars labeled with the “<” symbol indicate metabolite levels that are below the detection limit of the analytical method. Abbreviations: FL = floral; B = bracteal; C = circumbracteal; FO = foliar; Pre = pre-secretory; Sec = secretory; Post = post-secretory.
